# 1 Unexpected plasticity in the life cycle of *Trypanosoma brucei*

2 Sarah Schuster<sup>#</sup>, Ines Subota<sup>#</sup>, Jaime Lisack<sup>#</sup>, Henriette Zimmermann, Christian Reuter, Brooke

3 Morriswood and Markus Engstler\*

4 <sup>#</sup> these authors contributed equally

5 \* corresponding author: [markus.engstler@biozentrum.uni-wuerzburg.de](mailto:markus.engstler@biozentrum.uni-wuerzburg.de)

## 6 Abstract

7 African trypanosomes cause sleeping sickness in humans and nagana in cattle. These unicellular  
8 parasites are transmitted by the bloodsucking tsetse fly. In the mammalian host's circulation,  
9 tissues, and interstitium, at least two main life cycle stages exist: slender and stumpy bloodstream  
10 stages. Proliferating slender stage cells differentiate into cell cycle-arrested stumpy stage cells at  
11 high population densities. This developmental stage transition occurs in response to the quorum  
12 sensing factor SIF (stumpy induction factor), and is thought to fulfil two main functions. First, it  
13 auto-regulates the parasite load in the host. Second, the stumpy stage is regarded as pre-adapted  
14 for tsetse fly infection and the only stage capable of successful vector transmission. Here, we show  
15 that proliferating slender stage trypanosomes are able to complete the complex life cycle in the fly  
16 as successfully as the stumpy stage, and that a single parasite is sufficient for productive infection.  
17 Our findings not only propose a revision to the traditional rigid view of the trypanosome life cycle,  
18 but also suggest a solution to a long-acknowledged paradox in the transmission event: parasitaemia  
19 in chronic infections is characteristically low, and so the probability of a tsetse ingesting a stumpy  
20 cell during a bloodmeal is also low. The finding that proliferating slender parasites are infective to  
21 tsetse flies helps shed light on this enigma.

## 22 Introduction

23 Trypanosomes are among the most successful parasites. These flagellated protists infect all  
24 vertebrate classes, from fish to mammals, and can cause devastating diseases. African  
25 trypanosomes, which are transmitted by the tsetse fly, are the agents of nagana in livestock and  
26 sleeping sickness in humans (Bruce, London School of, & Tropical, 1895). The most intensively-  
27 studied African trypanosome species is *Trypanosoma brucei*, which in the past decades has  
28 emerged as a genetic and cell biological model parasite. The general life cycle of *T. brucei* was  
29 elucidated more than a century ago. As part of this life cycle, the trypanosomes undergo a full  
30 developmental program in the tsetse fly in order to become infective (Koch, 1909). This finding,  
31 made by Kleine in 1909, showed that transmission was not a purely mechanical event (Kleine,  
32 1909). Kleine subsequently found that the life cycle in the fly could take up to several weeks to  
33 complete, a discovery that was shortly afterwards confirmed by Bruce (Bruce, Hamerton,  
34 Bateman, & Mackie, 1909). More details of the general life cycle of *Trypanosoma brucei* were  
35 then elucidated by Robertson in 1913, with several key observations concerning the transmission  
36 event (Robertson & Bradford, 1913). Subsequent work has resulted in a detailed picture of the  
37 passage through the fly, beginning with the ingestion of trypanosomes in an infected bloodmeal  
38 (Rotureau & Van Den Abbeele, 2013). After entering through the tsetse proboscis, the infected  
39 blood is either held for a short time in the crop, which acts as a storage site, allowing tsetse to drink  
40 more blood per meal, or is passed directly to the midgut. Upon entering the tsetse midgut, the  
41 trypanosomes differentiate into the proliferative procyclic stage. Once established in the midgut,  
42 the parasites must pass the peritrophic matrix, a protective sleeve that separates the bloodmeal  
43 from midgut tissue. To do this, the parasites swim up the endotrophic space to the proventriculus,  
44 the site of peritrophic matrix synthesis, where they are able to cross to the ectotrophic space. After

45 having crossed the peritrophic matrix and entered the ectoperitrophic space, procyclic  
46 trypanosomes may either further colonize the ectotrophic anterior midgut, becoming the cell-cycle  
47 arrested mesocyclic stage, or continue directly to the proventriculus. In the proventriculus,  
48 trypanosomes further develop into the long, proliferative epimastigote stage (Rose et al., 2020).  
49 The epimastigotes then swim from the proventriculus to the salivary glands, while undergoing an  
50 asymmetric division to generate a long and a short daughter cell. Once in the salivary gland, the  
51 long daughter cell dies while the small one attaches via its flagellum to the salivary gland  
52 epithelium (Vickerman, 1969). The attached epimastigotes are proliferative, producing either more  
53 attached epimastigote daughter cells or freely swimming, cell cycle-arrested metacyclic  
54 trypanosomes. As early as 1911, it was clear that the metacyclic stage (at that time called  
55 metatrypanosomes) is the only mammalian-infective stage (Bruce, Hamerton, Bateman, &  
56 Mackie, 1911).

57 In the mammalian host, trypanosomes have been found in many different organs, including brain  
58 tissue, skin, and fat, but are hard to study experimentally (Capewell et al., 2016; Goodwin, 1970;  
59 Krüger, Schuster, & Engstler, 2018; Trindade et al., 2016). The two main stages found in the  
60 bloodstream, and the best-characterised experimentally, are the proliferating slender bloodstream  
61 stage and the cell cycle-arrested stumpy bloodstream stage (Krüger et al., 2018; Keith R.  
62 Matthews, Ellis, & Paterou, 2004; Vickerman, 1985). The stumpy stage is formed in response to  
63 quorum sensing of the stumpy induction factor (SIF), a signal produced by slender bloodstream  
64 trypanosomes (Vassella, Reuner, Yutzy, & Boshart, 1997). As the stumpy stage only survives for  
65 2-3 days after formation, the generation of stumpy parasites is thought to control the burden the  
66 parasites impose on the host (Turner, Aslam, & Dye, 1995). The SIF pathway that controls the  
67 slender-to-stumpy transition has been detailed down to the molecular level, with the *protein*

68 *associated with differentiation* (PAD1) as the first recognised molecular marker for the stumpy  
69 stage (Dean, Marchetti, Kirk, & Matthews, 2009; Mony & Matthews, 2015). More recently, it was  
70 also shown that the stumpy pathway can be triggered independently of SIF, though the extent to  
71 which this occurs in the general population remains unclear (Batram, Jones, Janzen, Markert, &  
72 Engstler, 2014; Zimmermann et al., 2017). Besides its proposed role in controlling parasitaemia in  
73 the mammalian host, the stumpy stage has a second essential function in the trypanosome life  
74 cycle: it is believed to be the only life cycle stage that can infect the tsetse fly (Rico et al., 2013).  
75 Thus, arrest of the cell cycle and differentiation to the stumpy stage are presumed essential for  
76 developmental progression to the procyclic insect stage. As early as 1912, Robertson suggested  
77 that the short, stumpy bloodstream trypanosomes represent the fly-infective stage (Robertson,  
78 1912). While this assumption was questioned several times throughout the 20<sup>th</sup> century, the  
79 discovery of quorum sensing and SIF in the 1990s made it become generally accepted (Vassella  
80 et al., 1997). However, if stumpy trypanosomes are the only stage that can infect the fly, another  
81 problem arises. Chronic trypanosome infections are characterised by low blood parasitemia,  
82 meaning that the chance of a tsetse fly ingesting any trypanosomes, let alone short-lived stumpy  
83 ones is also very low (Frezil, 1971; Wombou Toukam, Solano, Bengaly, Jamonneau, & Bucheton,  
84 2011). Mathematical models have been developed that aim to explain how the limited number of  
85 short-lived stumpy cells in the host blood and interstitial fluids can guarantee the infection of the  
86 tsetse fly, which is essential for the survival of the species (Capewell et al., 2019; MacGregor &  
87 Matthews, 2008; Seed & Black, 1999). The present study provides surprising new solutions to this  
88 problem. First, systematic quantification of infection efficiencies showed that very few  
89 trypanosomes are necessary to infect a tsetse fly, and in fact just one is sufficient. Second, and  
90 wholly unexpectedly, slender stages proved at least as competent at infecting flies as stumpy

91 stages. These findings suggest greater flexibility in the life cycle than supposed, prompting a  
92 revision to the current rigid view of the process.

## 93 Results

### 94 A single trypanosome is sufficient for infection of a tsetse fly.

95 Slender and stumpy bloodstream stage trypanosomes can be distinguished based on cell cycle,  
96 morphological, and metabolic criteria. The genome of the single mitochondrion (kinetoplast, K)  
97 and the cell nucleus (N) can be readily visualized using DNA stains, and their prescribed sequence  
98 of replication (1K1N, 2K1N, 2K2N) allows cell cycle stage to be inferred (Sherwin & Gull, 1989).  
99 Slender cells are found in all three K/N ratios, while stumpy cells, which are cell cycle-arrested,  
100 are found only as 1K1N cells (Fig. 1A). Expression of the *protein associated with differentiation*  
101 *1* (PAD1) is accepted as a marker for development to the stumpy stage (Dean et al., 2009). Cells  
102 expressing an NLS-GFP reporter fused to the 3' UTR of the PAD1 gene (GFP:PAD1<sup>UTR</sup>) will have  
103 GFP-positive nuclei when the PAD1 gene is active. Hence, slender cells are GFP-negative; stumpy  
104 cells are GFP-positive (Fig. 1A). The validity of the NLS-GFP reporter as an indicator for the  
105 activation of the PAD1 pathway (Batram et al., 2014; Zimmermann et al., 2017) was corroborated  
106 by co-staining with an antibody against the PAD1 protein (Supplementary Fig. 1). We have  
107 previously shown that stumpy cells can be formed independently of high cell population density  
108 ectopic expression of a second variant surface glycoprotein (VSG) isoform, a process that mimics  
109 one of the pathways involved in trypanosome antigenic variation (Batram et al., 2014; Cross, 1975;  
110 Hertz-Fowler et al., 2008; Zimmermann et al., 2017). These so-called expression site (ES)-  
111 attenuated stumpy cells can complete the developmental cycle in the tsetse fly (Zimmermann et  
112 al., 2017). It remained an open question whether this occurred with the same efficiency as with

Figure 1

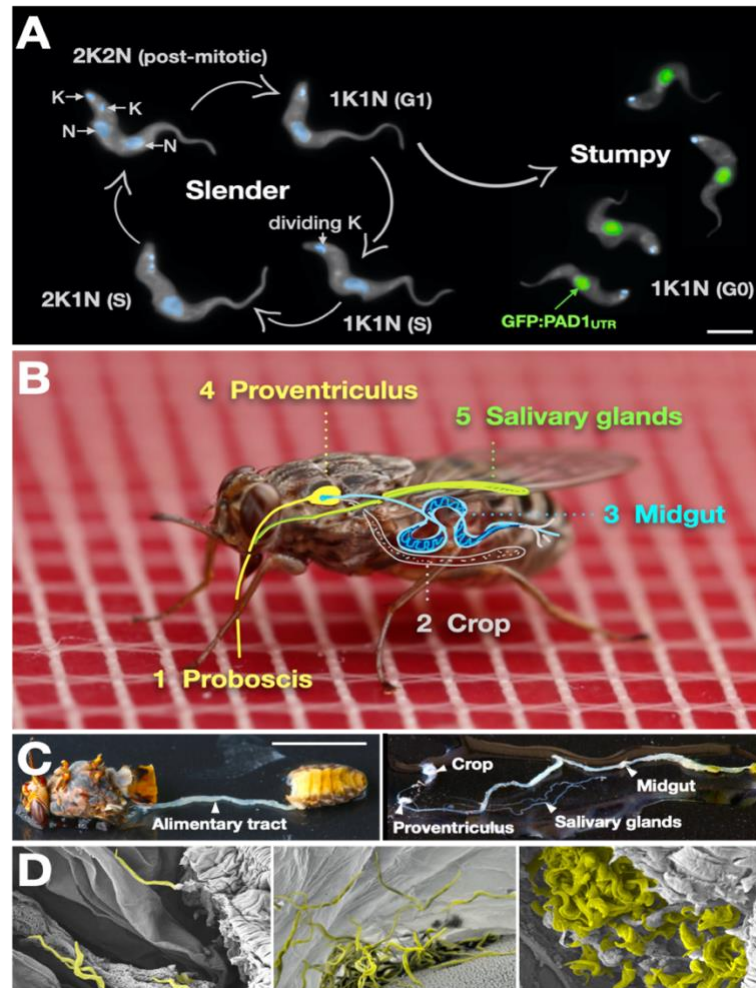

Figure 1. Slender trypanosomes can complete the entire life cycle in the tsetse fly vector. (A) Cell cycle (G1/S/post-mitotic), morphology, and differentiation of bloodstream form (mammalian-infective stage) trypanosomes. Proliferation of slender trypanosomes is detectable by duplication and segregation of the mitochondrial genome (kinetoplast, K) and nuclear DNA (N) over time. Quorum sensing causes cell cycle arrest (G0) and expression of the stumpy marker PAD1. Images are false-coloured, maximum intensity projections of deconvolved 3D stacks. The green colour indicates the nuclear GFP:PAD1<sup>UTR</sup> fluorescence, the DAPI-stained kinetoplast and nucleus are shown in light blue, and the AMCA-sulfo-NHS-labelled parasite cell surface is shown in gray. Scale bar: 5  $\mu$ m. (B) Trypanosome infections of tsetse flies were achieved via bloodmeal, which consists typically of 20  $\mu$ l, through a silicone membrane. To complete infection in a tsetse fly after an infective bloodmeal, trypanosomes first travel to the midgut, followed by the proventriculus, and finally must reach the salivary glands. The corresponding video is available in the Supplementary information (Supplementary Video 1). (C) The first panel depicts a dissected, infected tsetse fly for explanation of the alimentary tract. The second panel shows the explanted alimentary tract of the tsetse, with the different subcompartments labelled. Scale bar: 5 mm. (D) Scanning electron micrograph of a typical trypanosome infection of the tsetse midgut, proventriculus, and salivary glands. Parasites are false-coloured yellow. Scale bar: 1  $\mu$ m.



113 SIF-produced stumpy cells. Therefore, we quantitatively compared the transmission competence  
 114 of stumpy populations generated by either SIF treatment or through ES-attenuation. Tsetse flies  
 115 (*Glossina morsitans morsitans*) were infected via membrane feeding (Fig. 1B; Supplementary  
 116 Video 1) with defined numbers of pleomorphic stumpy trypanosomes, capable of completing the  
 117 entire developmental cycle. This cycle includes entrance through the proboscis, passage through  
 118 the crop, establishing infections in the midgut, proventriculus, and finally the salivary glands (Fig.  
 119 1B). Two transgenic trypanosome cell lines, both of which contained the GFP:PAD1<sup>UTR</sup> reporter  
 120 construct, were used. One was subjected to tetracycline-induced, ectopic VSG expression to drive  
 121 ES attenuation (Table 1, lines i-iii, Stumpy<sup>ES</sup>) (Zimmermann et al., 2017). The other was treated  
 122 with stumpy induction factor (Table 1, lines iv-vi, Stumpy<sup>SIF</sup>). Both treatments resulted in

Table 1

| Number of trypanosomes per blood meal |                          |       |               |               | Tsetse fly infection (%) |      |      |      |                 |                  |                 |   |
|---------------------------------------|--------------------------|-------|---------------|---------------|--------------------------|------|------|------|-----------------|------------------|-----------------|---|
|                                       | 1                        | 2     | 3             | 4             | 5                        | 6    | 7    | 8    | 9               | 10               | 11              | n |
|                                       |                          | Total | PAD1-negative | PAD1-positive | MG                       | PV   | SG   | TI   | Tsetse infected | Tsetse dissected | Sex ratio (♀/♂) |   |
| i                                     | Stumpy <sup>ES</sup>     | 2400  | 105           | 2295          | 19.3                     | 18.1 | 12   | 0.63 | 107             | 83               | 1.04            | 3 |
| ii                                    |                          | 20    | 1             | 19            | 25.3                     | 22.9 | 9.6  | 0.38 | 115             | 83               | 0.39            | 4 |
| iii                                   |                          | 2     | 0             | 2             | 14.6                     | 14.6 | 4.5  | 0.31 | 110             | 89               | 0.96            | 4 |
| iv                                    | Stumpy <sup>SIF</sup>    | 2     | 0             | 2             | 38.8                     | 29.3 | 11.2 | 0.29 | 120             | 116              | 1.70            | 2 |
| v                                     |                          | 1     | 0             | 1             | 20.2                     | 18.3 | 4.6  | 0.23 | 122             | 109              | 0.60            | 2 |
| vi                                    |                          | 0.2   | 0             | 0.2           | 7.5                      | 4.7  | 0.9  | 0.13 | 114             | 107              | 1.28            | 2 |
| vii                                   | Slender <sup>ES</sup>    | 20    | 19.16         | 0.84          | 22.5                     | 22.5 | 5.0  | 0.22 | 104             | 80               | 0.67            | 3 |
| viii                                  |                          | 2     | 1.93          | 0.07          | 13.2                     | 13.2 | 7.9  | 0.60 | 100             | 76               | 0.96            | 3 |
| ix                                    | Slender <sup>SIF</sup>   | 2     | 1.93          | 0.07          | 7.8                      | 7.8  | 4.7  | 0.60 | 156             | 129              | 1.44            | 3 |
| x                                     |                          | 1     | 0.99          | 0.01          | 4.7                      | 4.1  | 2.0  | 0.44 | 383             | 343              | 1.01            | 6 |
| xi                                    |                          | 0.2   | 0.002         | 0.198         | 0.9                      | 0.9  | 0.0  | 0.00 | 130             | 114              | 1.35            | 2 |
| xii                                   | Slender <sup>naive</sup> | 2     | 1.971         | 0.029         | 6.3                      | 3.6  | 2.7  | 0.43 | 350             | 331              | 0.96            | 6 |
| xiii                                  | Monomorph                | 2400  | 2395          | 5             | 11.0                     | 0.6  | 0.0  | 0.00 | 186             | 155              | 0.64            | 3 |
| xiv                                   |                          | 20    | 20            | 0             | 1.4                      | 0.0  | 0.0  | 0.00 | 216             | 127              | 0.76            | 3 |
| xv                                    |                          | 2     | 2             | 0             | 2.5                      | 0.0  | 0.0  | 0.00 | 298             | 257              | 0.87            | 3 |

Table 1. Slender trypanosomes can complete the entire tsetse infection cycle, and a single parasite is sufficient for tsetse passage. The flies were infected with either stumpy or slender trypanosomes. Stumpy trypanosomes were generated by induction of expression site attenuation (ES), or SIF-treatment (SIF). MG, midgut infection; PV, proventriculus infection; SG, salivary gland infection; TI, transmission index (SG/MG); n, number of independent fly infection experiments.

123 expression of the GFP:PAD1<sup>UTR</sup> reporter and rapid differentiation to the stumpy stage. The  
124 resulting stumpy populations were fed to tsetse flies at concentrations ranging from 120,000 to 10  
125 cells/ml. A feeding tsetse typically ingests about 20  $\mu$ l of blood (Gibson & Bailey, 2003), meaning  
126 that, on average, between 2,400 and 0.2 trypanosomes were ingested per bloodmeal (Table 1, rows  
127 i-vi, column 2, Total). The trypanosomes had previously been scored for expression of the  
128 GFP:PAD1<sup>UTR</sup> reporter to confirm their identity as the stumpy stage (Table 1, columns 3-4). To  
129 analyse the infections, we carried out microscopic analyses of explanted tsetse digestive tracts  
130 (Fig. 1C). The dissection of the flies was done 5-6 weeks post infection. The presence of mammal-  
131 infective, metacyclic trypanosomes in explanted tsetse salivary glands indicated the completion of  
132 the life cycle inside the tsetse. Remarkably, the uptake, on average, of two stumpy parasites of  
133 either cell line produced robust infections of tsetse midgut (MG), proventriculus (PV), and salivary  
134 glands (SG) (Fig. 1D; Table 1, columns 5-7). Ingestion, on average, of even a single stumpy cell  
135 was sufficient to produce salivary gland infections in almost 5% of all tsetse (Table 1, row v).  
136 When the stumpy parasite number was further reduced to 0.2 cells on average per bloodmeal,  
137 meaning every 5th fly would receive a stumpy cell, 0.9% of flies still acquired salivary gland  
138 infections (Table 1, row vi). As a measure of the incidence of life cycle completion in the tsetse  
139 fly, we calculated the transmission index (TI) for each condition. The TI has been defined as the  
140 ratio of salivary gland to midgut infections and hence, it is a measure for successful passage  
141 through the second part of the trypanosome tsetse cycle (Fig. 1B, 4-5)(Peacock, Ferris, Bailey, &  
142 Gibson, 2012). We found that for flies infected with 2 trypanosomes on average, the TI was  
143 comparable between SIF-induced (TI = 0.29) and ES-induced (TI = 0.31) stumpy trypanosomes  
144 (Table 1, rows iii-iv; Fig. 2). A similar TI of 0.23 was observed in flies ingesting on average 1  
145 trypanosome (Table 1, row v; Fig. 2). Thus, our data not only clearly show that SIF- and ES-



Figure 2

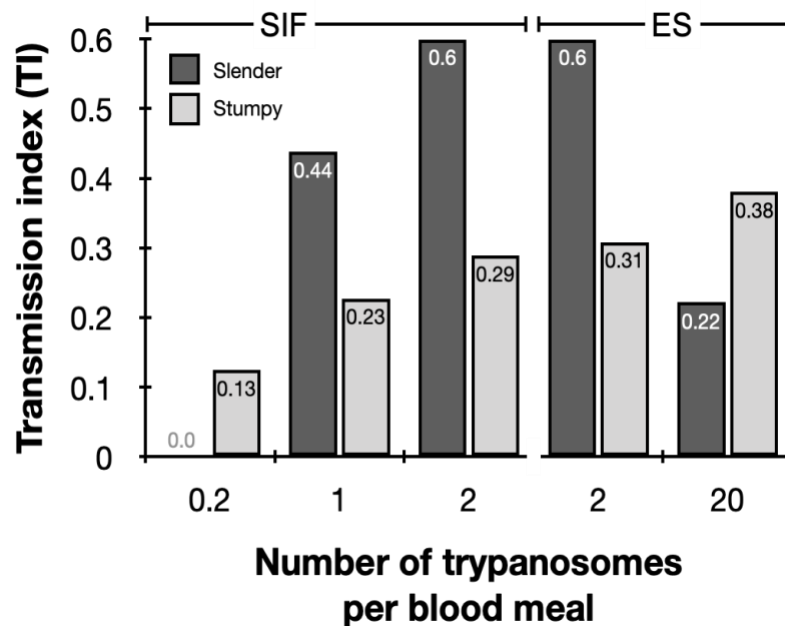

Figure 2. Graphical representation of the transmission index TI (SG/MG) of slender (dark gray) and stumpy (light gray) trypanosomes at different numbers per bloodmeal (data reproduced from Table 1, column 8). A high TI indicates successful completion of the life cycle in the tsetse vector. At low infective doses, slender trypanosomes had a higher TI compared to stumpy parasites. There was no difference between stumpy parasites generated by SIF-treatment (SIF) or expression site attenuation (ES).

146 induced stumpy parasites are equally efficient in completing the weeks-long, multi-step fly cycle,  
147 but also that a single stumpy cell is sufficient to produce a mature fly infection. While this may  
148 seem comparable with an observation that has been made before for *Trypanosoma congolense*  
149 (Maudlin & Welburn, 1989), the migration through the fly differs between the two species: *T.*  
150 *brucei* infects the salivary glands, while *T. congolense* infects the proboscis. The tsetse fly,  
151 however, is much more susceptible to infections with *T. congolense* than with *T. brucei*, with a  
152 nearly 5-fold increase in percent *T. congolense* proboscis infections as compared to *T. brucei*  
153 salivary gland infections. As the authors used GSH and NAG to boost *T. brucei* infections, the 5-  
154 fold difference is actually a lower estimate. (Peacock et al., 2012). Our results demonstrate that

155 very low numbers of *T. brucei* stumpy cells can also successfully establish mature tsetse fly  
156 infections.

157 Proliferating slender bloodstream stage trypanosomes infect the insect vector with comparable  
158 efficiency as cell cycle-arrested stumpy bloodstream stage parasites.

159 Originally intended as a control experiment with an easily predictable (negative) outcome, we  
160 infected tsetse flies with proliferating PAD1-negative slender trypanosomes from the two  
161 pleomorphic cell lines used (Table 1, rows vii-xi). Unexpectedly, we found that slender parasites  
162 were not only viable in the midgut, but also infected the proventriculus and the salivary glands.  
163 (Table 1, rows vii-xi). Even one slender parasite was sufficient to establish solid midgut infections,  
164 proving that slender and stumpy parasites are, in principle, equally viable in the tsetse midgut. The  
165 infection efficiency when the flies were fed with either 20 stumpy trypanosomes or 20 pleomorphic  
166 slender trypanosomes was similar (Table 1, compare TI in column 8 for rows ii and vii). When  
167 flies were fed with an average of 2 slender parasites each, the TI was actually higher for slender  
168 cells (0.60) than for stumpy cells (0.31) (Fig. 2). This TI of 0.60 was identical for both populations  
169 of slender cells (Fig. 2). Next, when given, on average, just one PAD1-negative slender cell per  
170 bloodmeal, parasite infections were still established in the midgut, proventriculus, and salivary  
171 glands with incidences of 4.7%, 4.1%, and 2.0% respectively, at a TI of 0.44 (Table 1, row x; Fig.  
172 2). In order to be absolutely sure that slender trypanosomes can passage through the tsetse, we  
173 repeated the experiment with naïve slender parasites that had been freshly differentiated from  
174 insect-derived metacyclic trypanosomes, i.e. cells that had just restarted the mammalian life cycle  
175 stage (Table 1, row xii). Infections with, on average, two freshly-differentiated slender  
176 trypanosomes per bloodmeal revealed 6.3% midgut and 2.7% salivary gland infections. The

177 transmission index was 0.43. This important control formally ruled out that cultivated slender cells  
178 had undergone any kind of gain-of-function adaptation in culture that made them transmission-  
179 competent.

180 As another control for the slender infection experiments, tsetse infections were carried out using a  
181 monomorphic slender trypanosome strain, i.e. one that had lost the capacity of differentiating to  
182 the stumpy stage (Table 1, rows xiii - xv). Monomorphic trypanosomes are known to be – in  
183 principle - able to infect the tsetse midgut, but they are incapable of completing the developmental  
184 cycle in the fly (Herder et al., 2007; Peacock, Ferris, Bailey, & Gibson, 2008). As expected, no  
185 salivary gland infections were seen using these cells, even at high infection numbers. Interestingly,  
186 we found that even two monomorphic slender parasites can establish a fly midgut infection (Table  
187 1, row xv). Thus, infection of the tsetse midgut is independent of the capacity for developmental  
188 progression and the infective dose, and it does not require the stumpy life cycle stage. This finding  
189 also challenges the assumption that slender parasites are selectively eliminated from the parasite  
190 population and that only stumpy trypanosomes can survive the harsh conditions thought to prevail  
191 within the tsetse crop and midgut (Nolan, Rolin, Rodriguez, Van Den Abbeele, & Pays, 2000).

192 The ES-attenuated cells showed similar midgut, proventriculus, and salivary gland infection  
193 incidence as either the stumpy or slender stage (Table 1, rows ii-iii and vii-viii). The SIF-induced  
194 stumpy cells, however, appeared more effective in establishing midgut infections than their slender  
195 counterparts (Table 1, rows iv-vi and ix-xi). This result could be interpreted as stumpy  
196 trypanosomes being more successful in the tsetse fly, but this is a conclusion that is clearly not  
197 supported by our data. First, the infections with 1-2 slender cells produced higher TI values than  
198 those with the same numbers of stumpy cells (Fig. 2). This suggests that the proliferative slender  
199 cells are actually more capable of progressing from a midgut infection to a salivary gland one, and

200 thus have at least comparable overall developmental competence to the stumpy stage. Second, the  
201 lack of correlation between infective dose and midgut infections underlines the importance of the  
202 TI as a relative measure. What is biologically relevant is not the initiation of infection but the  
203 completion of the tsetse passage. In summary, our experiments not only establish that a single *T.*  
204 *brucei* (either slender or stumpy) parasite can infect the tsetse fly, but also proves that slender cells  
205 can efficiently complete the passage through the tsetse fly.

206 In the tsetse midgut, dividing slender bloodstream stage parasites activate the PAD1 pathway and  
207 differentiate to the procyclic insect stage without arresting the cell cycle.

208 To determine how pleomorphic slender trypanosomes manage to establish infections, we observed  
209 the early events following trypanosome ingestion by tsetse flies (Supplementary Video 2). The  
210 canonical version of events is that ingested stumpy (i.e. PAD1-positive) cells reactivate the cell  
211 cycle, begin to express the EP procyclin protein on their cell surface, and differentiate to the  
212 procyclic life cycle stage (Dean et al., 2009; K R Matthews & Gull, 1994; Mowatt & Clayton,  
213 1987; Richardson, Beecroft, Tolson, Liu, & Pearson, 1988; Roditi et al., 1989; Ziegelbauer &  
214 Overath, 1990). We infected tsetse with pleomorphic trypanosomes, which not only contained the  
215 stumpy-specific GFP:PAD1<sup>UTR</sup> marker, but also encoded an EP1:YFP fusion (Fig. 3) (Engstler &  
216 Boshart, 2004). In this way, the onset of stumpy development was observable as GFP fluorescence  
217 in the nucleus, and further differentiation to the procyclic life cycle stage as YFP fluorescence on  
218 the parasite cell surface. In addition, the cell cycle status (K/N counts, see Fig. 1A), morphology,  
219 and the characteristic motile behavior of the trypanosomes were also assessed as criteria of  
220 developmental progress. In total, 114 tsetse flies (57 male and 57 female) were dissected after at  
221 least six independent infections with either 12,000 slender or stumpy parasites each. These high  
222 initial parasite numbers allowed the microscopic analysis of individual living slender (n = 1845)

Figure 3

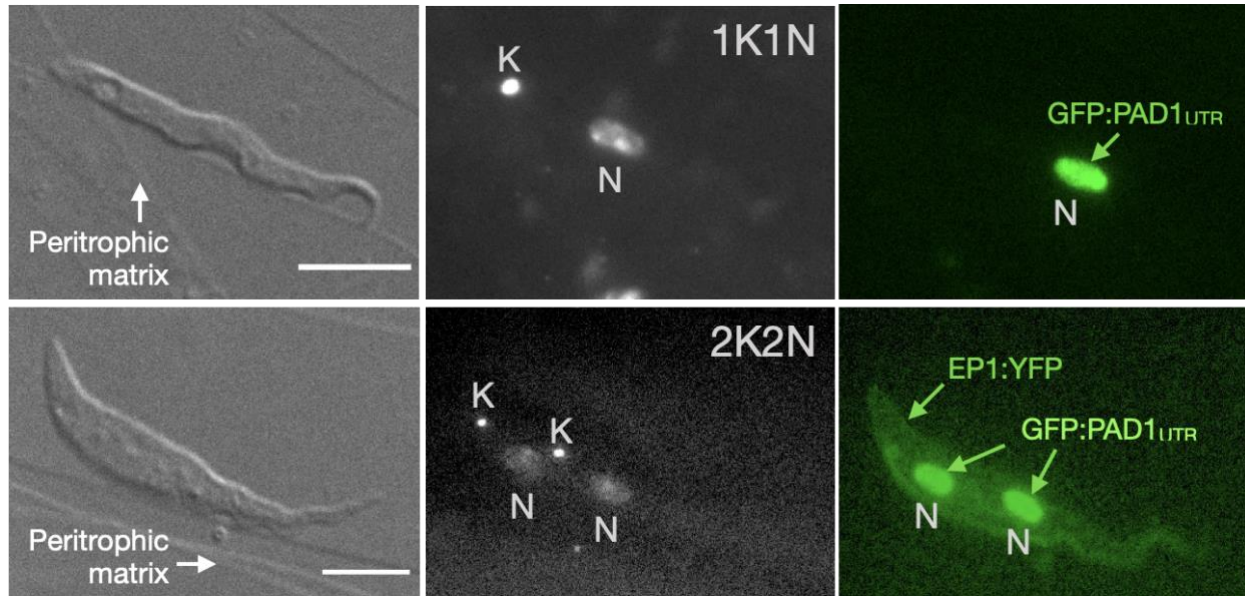

Figure 3. Exemplary images of procyclic trypanosomes in the tsetse explants 24 hours post infection with slender cells. Morphology (DIC panels, left), cell cycle status (DAPI label, middle panels) and expression of fluorescent reporters (right) were scored. Note that the upper panels show a cell with procyclic morphology that is nonetheless EP1:YFP negative, indicating that the EP1 signal underestimates the total numbers of procyclic cells in the population. Scale bar: 5  $\mu$ m.

223 and stumpy trypanosomes (n = 1237) within the convoluted microenvironment of midgut explants  
224 (Schuster et al., 2017). As early as 2-4 h post-infection with slender trypanosomes, a few (0.8%)  
225 2K1N dividing trypanosomes with a nuclear PAD1 signal could be observed (Fig. 4). After 8-10  
226 hours however, half (38.3+6.8+5.3=50.4%) of all trypanosomes in the explants were PAD1-  
227 positive (Fig. 4, bar chart shows summed cell cycle category values for PAD1-positive cells). After  
228 24 hours, 84.3% (56.3+15.0+13.0) of the parasites expressed PAD1. Of these, 9.8% had already  
229 initiated developmental progression to the procyclic insect stage, as evidenced by EP1:YFP  
230 fluorescence on their cell surface (Fig. 5). At 48-50 h post-infection with slender trypanosomes,  
231 virtually the entire trypanosome population (91.8%) expressed PAD1, and almost one fifth  
232 (19.1%) of cells were EP1-positive (Fig. 5). To examine cell cycle progression, we counted the  
233 number of 1K1N, 2K1N, and 2K2N cells in the PAD1-positive and PAD1-negative slender cell

Figure 4

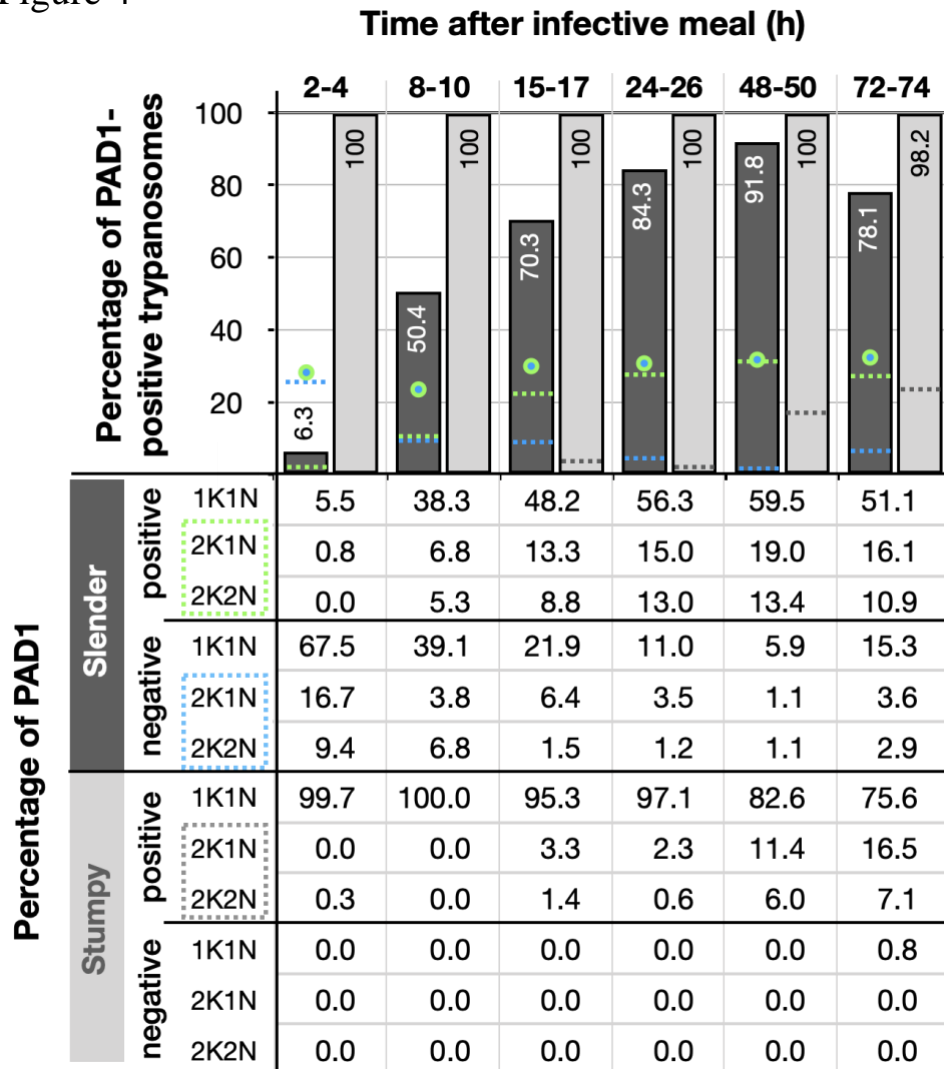

Figure 4. Slender trypanosomes activate the PAD1 pathway upon uptake by the tsetse fly, without cell cycle arrest. Tsetse flies were infected with either slender (3.6% PAD1-positive) or stumpy (100% PAD1-positive) trypanosomes. 72 (slender) or 42 (stumpy) flies were dissected (equal sex ratios) at different timepoints after infection. Experiments were done at least three times; data are presented as sample means. Living trypanosomes (>100 cells per time point) were microscopically analysed in the explants and scored for the expression of the fluorescent stumpy reporter GFP:PAD1<sup>UTR</sup> in the nucleus. Stumpy cells (n=1237) are dark gray bars and slender cells (n=1845) are light gray bars. Slender and stumpy trypanosomes scored as PAD1-positive or -negative were also stained with DAPI, and the cell cycle position determined based on the configuration of kinetoplast (K) to nucleus (N) at the timepoints. Percentages of the population that were PAD1-positive and PAD-1 negative in the different cell cycle stages are indicated in the bottom table. The cell cycle stages are also displayed visually in top bar graph. As seen, while the total percentage of dividing slender cells remains constant over time (blue/green circles), the percentage of PAD-1 positive slender cells steadily increases (dotted green line) and the percentage of PAD-1 negative cells steadily decreases. This shows that slender cells can seamlessly turn on the PAD-1 pathway, without arresting in the cell cycle. Stumpy cells do not start having a normal cell cycle profile until 48 hours after tsetse uptake (dotted gray line - all PAD-1 positive), as the cells transition to the procyclic stage.



Figure 5

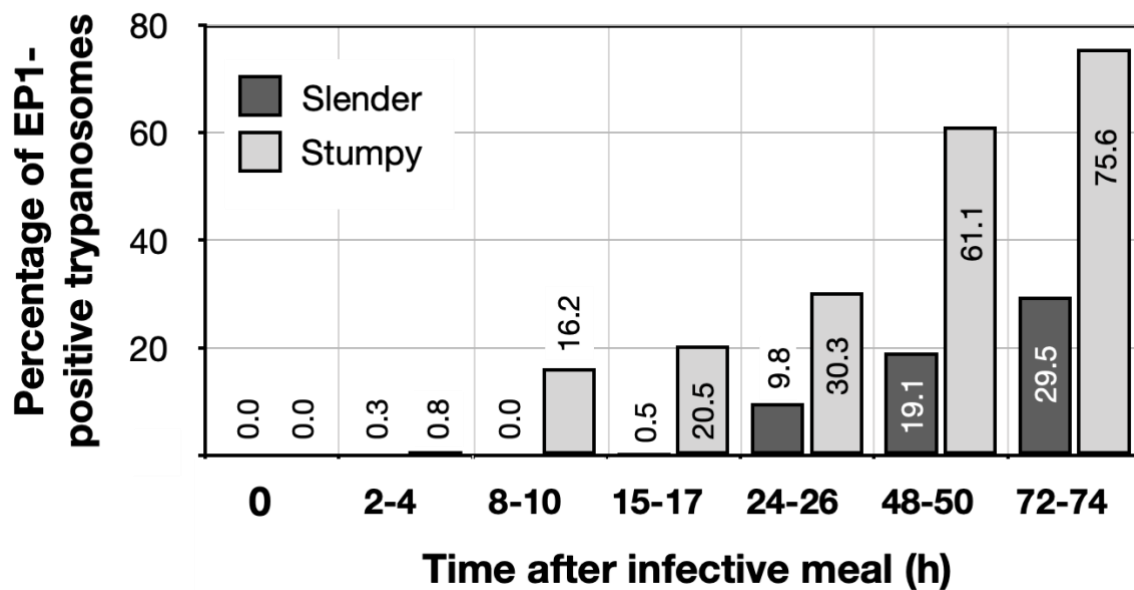

Figure 5. Slender trypanosomes differentiate to the procyclic life cycle stage in the tsetse fly without undergoing cell cycle arrest. Tsetse flies were infected with either slender (3.6% PAD1-positive) or stumpy (100% PAD1-positive) trypanosomes. 72 (slender) or 42 (stumpy) flies were dissected (equal sex ratios) at different timepoints after infection. Experiments were done at least three times; data are presented as sample means. Living trypanosomes (>100 cells per time point) were microscopically analysed in the explants and scored for the procyclic insect stage reporter EP1:YFP on the cell surface. Stumpy cells (n=1237) are shown by light gray bars and slender cells (n=1845) by dark gray bars.

234 populations (Fig. 4, Slender rows). Remarkably, 15-17 h post-infection, the majority of all  
235 replicating (i.e. 2K1N, 2K2N) cells were PAD1-positive (Fig. 4). No indication for a transient cell  
236 cycle arrest or intermittent impairment of cell cycle progression was observed. Over the duration  
237 of the experiment, PAD1-negative cells gradually decreased in numbers, while PAD1-positive  
238 slender cells at all cell cycle stages were increasingly observed (Fig. 4, dotted green and blue lines;  
239 Supplementary Video 2C). After two days, more than 90% of dividing trypanosomes were PAD1-  
240 positive. Thus, the PAD1 pathway was triggered in slender trypanosomes upon ingestion by the  
241 fly, and without prior cell cycle arrest.  
242 In order to directly compare the kinetics of slender-to-procyclic development with that of stumpy  
243 stage trypanosomes, we fed flies with SIF-induced, PAD1-positive stumpy trypanosomes (Fig. 4,

244 Stumpy rows). These cells remained as 1K1N cells in cell cycle arrest for the first day, and re-  
245 entered the cell cycle as procyclic parasites after 2 days. Four hours after uptake by the tsetse fly,  
246 stumpy trypanosomes started expressing EP1:YFP (Fig. 5). The fluorescent reporter was visible  
247 on 16.2 % of stumpy cells after 10 hours, showing that EP expression was initiated before release  
248 of cell cycle arrest. Uncoupling of EP surface expression from the commitment to differentiation  
249 has been reported before (Engstler & Boshart, 2004).

250 EP1:YFP expression in slender parasites lagged 12 hours behind stumpy cells, only becoming  
251 widespread after 24-26 hours (Fig. 5). Thus, the onset of EP1 expression was shifted, but the  
252 kinetics of differentiation were comparable in slender and stumpy parasites. Hence, activation of  
253 the PAD1 pathway also preceded developmental progression in slender cells. This means that  
254 expression of PAD1 is essential for differentiation to the insect stage, while cell cycle arrest is not.  
255 Of note, EP1 expression did not directly correlate with acquisition of procyclic morphology. At  
256 24-26h, 9.8% of slender cells were EP1-positive (Fig. 5), but the EP1-negative cells frequently  
257 exhibited procyclic morphology (Fig. 3, upper panels). An example of a dividing (2K2N), PAD1-  
258 positive, EP1-positive cell is also shown (Fig. 3, lower panels; Supplementary Video 2D). Thus,  
259 it appears that a seamless developmental stage transition from the slender bloodstream stage to the  
260 procyclic insect stage took place, which was accompanied by the typical re-organization of the  
261 cytoskeleton and the concomitant switch of swimming styles (Heddergott et al., 2012; Schuster et  
262 al., 2017).

263 Pleomorphic slender bloodstream stage trypanosomes can seamlessly differentiate to the procyclic  
264 insect stage without preceding cell cycle arrest in vitro.

265 The factor(s) or condition(s) that trigger differentiation of bloodstream stage trypanosomes to the  
266 procyclic insect stage in the tsetse midgut are still ill-defined. In the laboratory, differentiation to  
267 the procyclic insect stage is routinely induced by the addition of *cis*-aconitate, a drop in glucose,  
268 and a temperature drop from 37°C to 27°C (Brun, Jenni, Schönenberger, & Schell, 1981; Czichos,  
269 Nonnengaesser, & Overath, 1986; Engstler & Boshart, 2004; Qiu et al., 2018; Ziegelbauer,  
270 Quinten, Schwarz, Pearson, & Overath, 1990) (Fig. 8).

271 We used this protocol to further investigate the developmental potential of cultivated pleomorphic  
272 slender bloodstream stage *in vitro* using the same cell lines and analysis as above (Fig. 6). Slender  
273 trypanosomes activated the PAD1 pathway rapidly after receiving the trigger, with 9.8% of all  
274 parasites being PAD1-positive within 2-4 hours, and 83.2% after 10 hours. PAD1 expression  
275 peaked after one day (98.3%), and declined thereafter (Fig. 6). Shortly after PAD1 reporter  
276 expression, EP1 appeared on the cell surface of 19.6% of all parasites within 8-10 hours, increasing  
277 to 98.3% after 3 days (Fig. 7). PAD1 and EP protein appearance on the cell surface was monitored  
278 throughout the timecourse using immunofluorescence (Supplemental Fig. 2). Throughout the  
279 timecourse, PAD1-positive 2K1N and 2K2N cells were continually observed, demonstrating that  
280 the PAD1-positive slender parasites did not arrest in the cell cycle, and continued dividing  
281 throughout *in vitro* differentiation to the procyclic stage (Fig. 6, Slender rows). After 3 days of *cis*-  
282 aconitate treatment *in vitro*, slender trypanosomes had established a proliferating procyclic parasite  
283 population.

284 By comparison, stumpy parasites (Fig. 6, Stumpy rows) responded to *in vitro cis*-aconitate  
285 treatment with rapid expression of the EP1:YFP marker, with 28.6% of all cells being positive  
286 within 2-4 hours (Fig. 7). After one day, EP1 was present on almost all (96.7%) stumpy  
287 trypanosomes. The cell cycle analysis revealed that the parasites were not dividing, however (Fig.

Figure 6

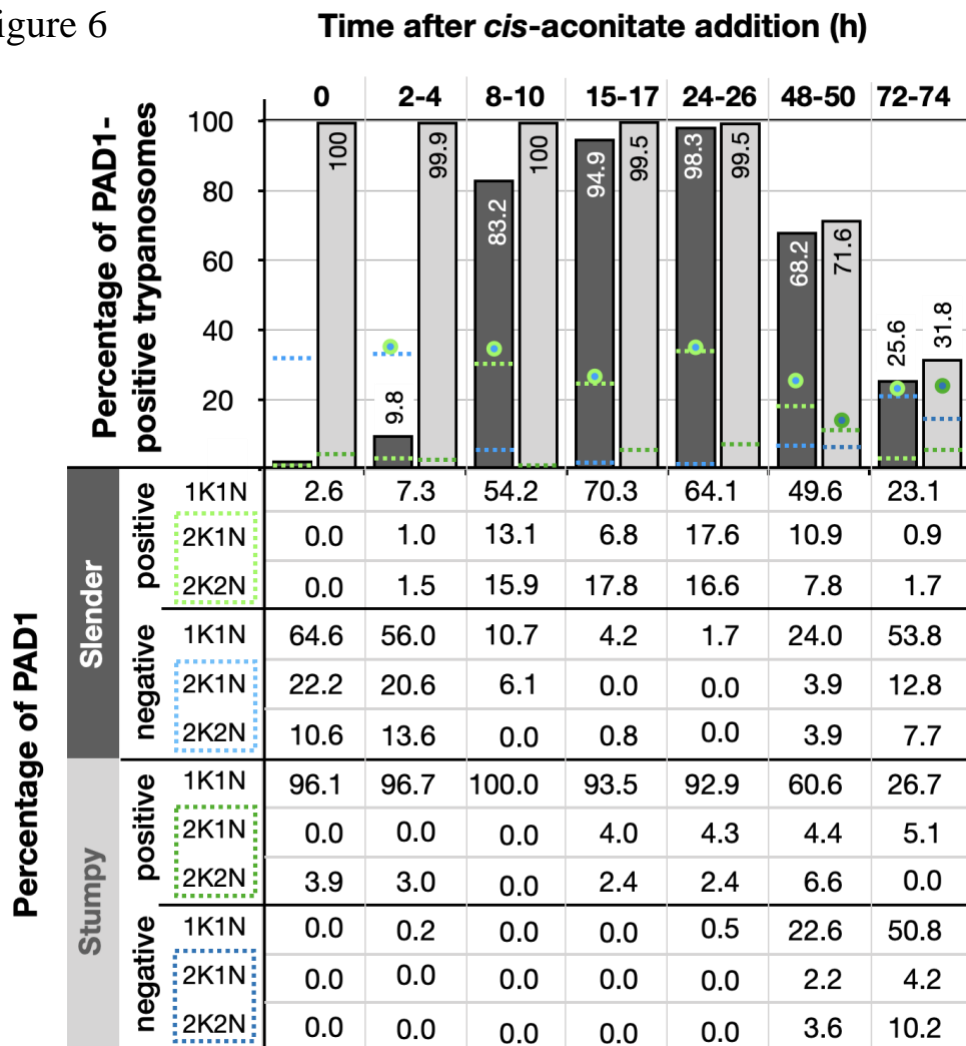

Figure 6. Slender trypanosomes activate the PAD1 pathway *in vitro* without cell cycle arrest. Cultured slender or stumpy trypanosomes were differentiated *in vitro* by the addition of *cis*-aconitinate and temperature reduction to 27°C. At the times indicated, trypanosomes were analysed for the expression of the fluorescent stumpy reporter GFP:PAD1<sup>UTR</sup>, as in Fig. 4. Slender cells (n=1653) are shown by dark gray bars and stumpy cells (n=1798) in dark gray bars. Slender and stumpy trypanosomes were also stained with DAPI and the configuration of the nucleus (N) and kinetoplast (K) was microscopically determined to identify the cell cycle stage. Percent of the population as either PAD1-positive and PAD-1 negative in the different cell cycle stages are indicated in the bottom table. The cell cycle stages are also displayed visually in top bar graph. As seen, while the total percentage of dividing slender cells remains constant over time (blue/green circles), the percentage of PAD-1 positive slender cells steadily increases (dotted green line) and the percentage of PAD-1 negative cells steadily decreases (dotted blue line). This shows that slender cells can seamlessly turn on the PAD-1 pathway, without arresting in the cell cycle. Though a small portion of the stumpy population is seen dividing throughout the time points (dark green dotted lines - PAD-1 positive), cells do not return to a normal cell cycle profile until 48 hours after the addition of *cis*-aconitinate (total percentage of dividing cells shown as dark blue/green circles). As the stumpy cells become more procyclic, they begin to lose their PAD-1 positive signal and increase in PAD-1 negative dividing cells (dark blue dotted lines). Data were compiled from five independent experiments, with each time point being analysed in at least two separate experiments.

Figure 7

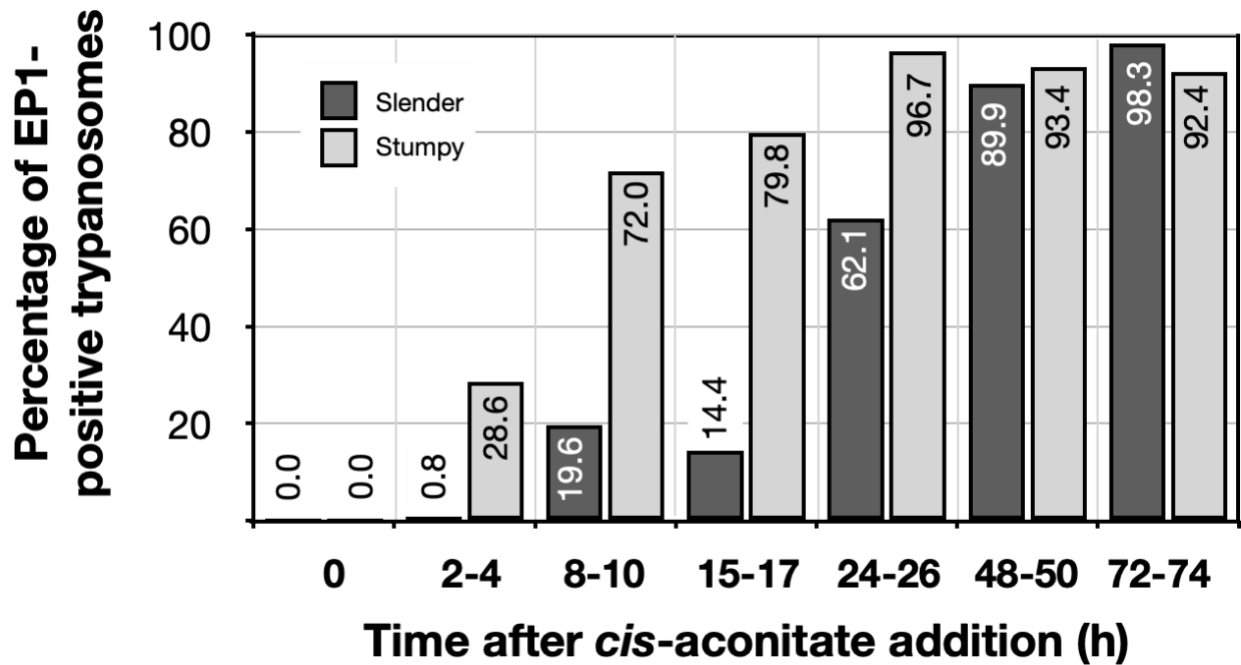

Figure 7. Slender trypanosomes differentiate to the procyclic life cycle stage *in vitro* without cell cycle arrest. Cultured slender or stumpy trypanosomes were differentiated *in vitro* by the addition of *cis*-aconitate and temperature reduction to 27°C. At the times indicated, trypanosomes were analysed for the expression of the procyclic fluorescent reporters EP1:YFP, as in Fig. 5 Stumpy cells (n=1798) are shown by light gray bars and slender cells (n=1653) by dark gray bars.

288 6, Stumpy rows). The first cells re-entered the cell cycle only after 15-17 hours, and a normal  
289 procyclic cell cycle profile was not reached until day 3. Thus, the *in vitro* differentiation supported  
290 the *in vivo* observations, demonstrating that pleomorphic slender trypanosomes are able to directly  
291 differentiate to the procyclic stage without becoming cell cycle-arrested stumpy cells. The surface  
292 expression of EP1 is also of note, as it has been shown that in slender bloodstream parasites,  
293 ectopically expressed EP1 does not enter the cell surface, but is retained in endosomes and the  
294 flagellar pocket (Engstler & Boshart, 2004). Hence, as in stumpy trypanosomes, the slender  
295 trypanosome cell surface access block is lifted by triggering the PAD1 pathway. Furthermore, the  
296 overall developmental capacity and differentiation kinetics of both life cycle stages are  
297 comparable, *in vitro* and *in vivo*.

298 Discussion

299 Our observations suggest a revised view of the life cycle of African trypanosomes (Fig. 8). We  
300 show that one trypanosome suffices to produce robust infections of the tsetse vector, and that the  
301 stumpy stage is not essential for tsetse transmission. Slender parasites can complete the complex  
302 life cycle in the fly with comparable overall success rates and kinetics as the stumpy stage.  
303 Interestingly, the stumpy stage appears more able to establish initial infections in the fly midgut  
304 (Table 1, column 5, MG), while slender-derived parasites appear to produce salivary gland  
305 infections more efficiently than stumpy-derived counterparts (Table 1, column 8, TI). At first sight,  
306 this discrepancy may be related to a greater resistance of the stumpy stage to the digestive  
307 environment in the fly's gut, as has been suggested (Matetovici, De Vooght, & Van Den Abbeele,  
308 2019; Nolan et al., 2000). This, however, is not supported by our data. We have not observed cell  
309 death of monomorphic or pleomorphic slender cells in infected tsetse midguts. And even if so,  
310 why then should slender-derived cells perform better in the second part of the life cycle? As there  
311 will not be a difference between slender- and stumpy-derived procyclic cells, the difference  
312 observed must be based on the behavior of bloodstream parasites in the midgut. It is tempting to  
313 speculate that one decisive factor could be trypanosome motility. Slender trypanosomes exhibit  
314 significantly higher motility compared to stumpy trypanosomes (Bargul et al., 2016). Thus, the  
315 mean square displacement in the midgut will be much larger for slender parasites. While stumpy  
316 trypanosomes probably never reach the "midgut exit" before differentiation to the insect stage,  
317 slender trypanosomes could already be located close to the proventriculus before starting to  
318 differentiate to the procyclic stage. Thus, passage through the proventriculus could occur  
319 immediately, and the slender-derived trypanosomes could rapidly progress to the mesocyclic stage.  
320 This faster mesocyclic progression would result in a less-pronounced infection of the midgut, and



321 a higher TI-value for the slender-derived trypanosomes. While the above hypothesis is consistent  
322 with our data, experimental proof would be extremely challenging to obtain. The recent  
323 demonstration that glucose levels are a developmental trigger in addition to the well-characterised  
324 ones of cold shock and cis-aconitate adds another layer of complexity to the early events during  
325 tsetse infection (Qiu et al., 2018).

Figure 8

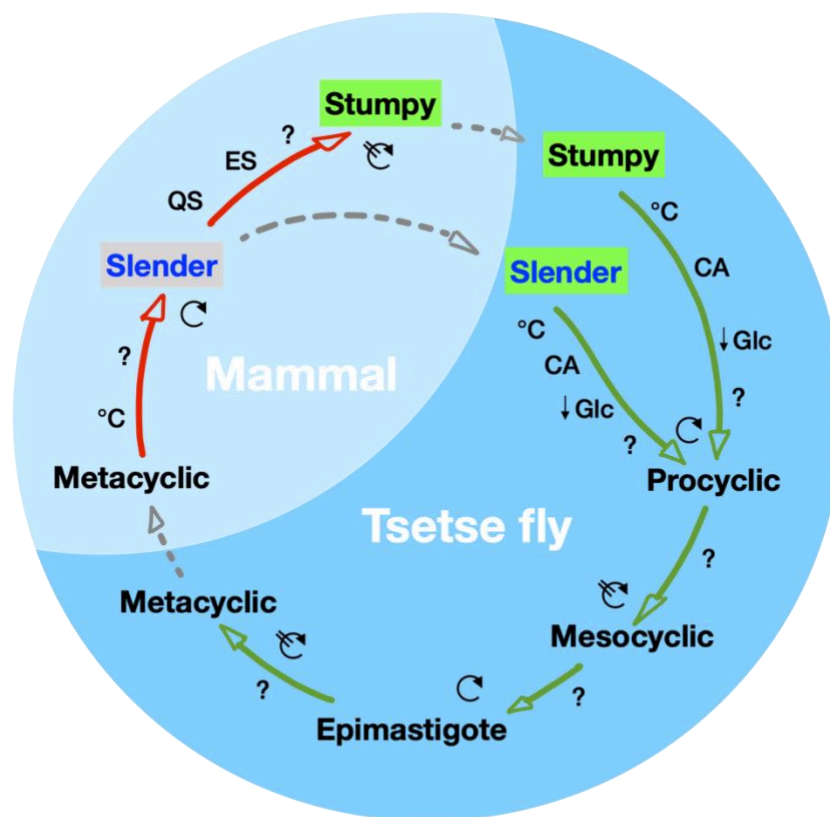

Figure 8. A revised life cycle for the parasite *Trypanosoma brucei*. Cell-cycle-arrested metacyclic trypanosomes are injected by the tsetse fly into the mammalian host's skin. There, the parasites re-enter the cell cycle, and proliferate as slender forms in the blood, while disseminating into the interstitium and various tissues, including fat, and brain. At least two triggers (SIF or ES) launch the PAD1-dependent differentiation pathway (light green boxes) to the cell cycle-arrested stumpy bloodstream stage. Stumpy trypanosomes can establish a fly infection when taken up with the bloodmeal of a tsetse. This work reveals that proliferating slender stage trypanosomes are equally effective for tsetse transmission, that a single parasite suffices, and that no cell cycle arrest is required for differentiation to the procyclic insect stage.

326 The dogma that cell cycle-arrested stumpy cells are the only trypanosomes that infect the tsetse fly  
327 has never been experimentally challenged, although there are quite a number of reports that point  
328 against an exclusive role for stumpy parasites in the life cycle. Koch's detailed report on the  
329 activities of the German sleeping sickness commission sent to East Africa in 1906/7 states that the  
330 trypanosome numbers in the blood of human sleeping sickness infections was always very low  
331 (Koch, 1909). From his data we have calculated an average blood parasitaemia between 10 and  
332 100 trypanosomes cells/ml (see Supplemental text doc). This means that 2 or fewer trypanosomes  
333 would be present in an average tsetse bloodmeal, again highlighting the rarity of a tsetse taking up  
334 a stumpy cell. In 1930, Duke discussed the evidence for the essential status of the stumpy stage  
335 for tsetse transmission, and his data did not support it (Duke, 1930). Further, Baker and Robertson  
336 in 1957 compared the infection capability of *T. rhodesiense* and *T. brucei* using guinea pig feeding  
337 (Baker & Robertson, 1957). They concluded: 'Neither the morphology nor the intensity of the  
338 parasitaemia in the infecting mammal was obviously related to the subsequent infection rates in  
339 the tsetse-flies.' In 1990, Bass and Wang, in fact, suggested that the stumpy stage may be  
340 dispensable for development to the insect stage (Bass & Wang, 1991). The experiments, however,  
341 were in part inconclusive, mainly because a molecular marker for the stumpy stage was missing.  
342 The discovery of SIF in the 1990s and the realisation that quorum sensing underpinned the  
343 differentiation to the stumpy stage led to an assumption that the slender stage had no role to play  
344 in the transmission event. Subsequent research has been focused on the details of stumpy  
345 formation, while the developmental role of the stumpy cell has not undergone further examination.  
346 The above publications all relate to what is nowadays referred to as the transmission paradox, the  
347 persistence and circulation of trypanosomiasis in a population even when parasitaemia levels in  
348 individuals are low or close to elimination (Capewell et al., 2019). When parasitaemia is low,

349 stumpy trypanosomes are characteristically absent, making the probability of being ingested by a  
350 tsetse fly (which on average ingests 20 $\mu$ l of blood) extremely low. Yet trypanosomiasis persists,  
351 even when statistically it should by now have been eliminated. Solutions to the paradox have long  
352 been hypothesized and variously include flawed diagnostic testing, asymptomatic cases, and  
353 animal reservoirs (Alvar et al., 2020). Recent work using theoretical modelling suggests that for  
354 *T. gambiense*, trypanosomes residing in the skin of humans could solve the problem (Capewell et  
355 al., 2019). However, there are currently no data available on the number of trypanosomes located  
356 in asymptomatic human skin, nor have the kinetics of fly uptake of skin-localised trypanosomes  
357 been explored. Also, different tsetse-transmitted trypanosome species reveal rather distinct  
358 distributions in the host, such as *Trypanosoma congolense* preferentially residing in small blood  
359 vessels (BANKS, 1978). Thus, while trypanosomes in the skin may be important for the  
360 persistence of the parasites, their existence alone does not automatically solve the transmission  
361 paradox. As tsetse are blood pool feeders, it actually does not matter if the trypanosomes reside in  
362 the skin, fat tissue, or blood. Just one or two parasites, stumpy or slender, suffice for infection.  
363 Furthermore, stumpy cells will inevitably run into an age-related problem. They are not replicative,  
364 and their lifetime is limited to roughly 3 days (Turner et al., 1995). In the fly, re-entry into the cell  
365 cycle is by no means immediate, but takes at least one day. Following induction of cell cycle arrest,  
366 the stumpy cells would need to be taken up by the fly within one day. Thus, only a subset of rather  
367 young stumpy cells would prove successful in the midgut. It is important to note that this is not  
368 the case in our experiments, as only freshly differentiated stumpy cells were used for tsetse  
369 infection. Thus, our experiments in fact overestimate the success of stumpy stage trypanosomes.  
370 It is worth emphasizing that our data provide a possible solution to the transmission paradox  
371 without falsifying any of the extensive published work on stumpy trypanosomes. We have shown

372 that slender and stumpy trypanosomes are equally competent for fly passage. The PAD1 pathway  
373 has an essential role in preparing both bloodstream stages for differentiation to the procyclic cell  
374 stage. For successful passage through the tsetse fly, however, the stumpy stage is not uniquely  
375 required. Along similar lines, it is worth noting that *Trypanosoma congolense*, the principal  
376 causative agent of the cattle plague nagana, infects tsetse flies without manifesting a cell cycle-  
377 arrested stumpy stage (Rotureau & Van Den Abbeele, 2013). Thus, the essential biological function  
378 of the stumpy life cycle stage in *T. brucei* may not be transmission, but rather quorum sensing  
379 (SIF)-dependent control of population size in the host. This pathway can be triggered in other  
380 ways, and even at low levels of parasitaemia, for example by VSG expression site attenuation  
381 (ES) (Zimmermann et al., 2017). The capacity for inducing cell cycle arrest at the single cell level  
382 might actually have been important for the evolution of antigenic variation. As not all trypanosome  
383 species develop a stumpy life cycle stage (Rotureau & Van Den Abbeele, 2013), density-dependent  
384 differentiation at the population level may well be a later innovation in evolution, and specific to  
385 the *T. brucei* group. In conclusion, our work exemplifies a high degree of plasticity in the life cycle  
386 of an important parasite. It shows that the trypanosome life cycle is not rigid but proposes a revised  
387 and less rigid view of the trypanosome life cycle and helps solve a longstanding question in  
388 parasitology.

## 389 Methods

### 390 *Trypanosome culture*

391 Pleomorphic *Trypanosoma brucei brucei* strain EATRO 1125 (serodome AnTat1.1) (Le Ray,  
392 Barry, Easton, & Vickerman, 1977) bloodstream stages were grown in HMI-9 medium (Hirumi &  
393 Hirumi, 1989), supplemented with 10% (v/v) fetal bovine serum and 1.1% (w/v) methylcellulose

394 (Sigma 94378, Munich, Germany)(Vassella et al., 2001) at 37°C and 5% CO<sub>2</sub>. Slender stage  
395 parasites were maintained at a maximum cell density of 5x10<sup>5</sup> cells/ml. For cell density-triggered  
396 differentiation to the stumpy stage, cultures seeded at 5x10<sup>5</sup> cells/ml were cultivated for 48 hours  
397 without dilution. Pleomorphic parasites were harvested from the viscous medium by 1:4 dilution  
398 with trypanosome dilution buffer (TDB; 5 mM KCl, 80 mM NaCl, 1 mM MgSO<sub>4</sub>, 20 mM  
399 Na<sub>2</sub>HPO<sub>4</sub>, 2 mM NaH<sub>2</sub>PO<sub>4</sub>, 20 mM glucose, pH 7.6), followed by filtration (MN 615 ¼,  
400 Macherey-Nagel, Dueren, Germany) and centrifugation (1,400xg, 10 min, 37°C)(Zimmermann et  
401 al., 2017). Monomorphic *T. brucei* 427 MITat 1.2 13-90 bloodstream stage (Wirtz, Leal, Ochatt,  
402 & Cross, 1999) were grown in HMI-9 medium (Hirumi & Hirumi, 1989), supplemented with 10%  
403 (v/v) fetal bovine serum at 37°C and 5% CO<sub>2</sub>.

404 For *in vitro* differentiation to the procyclic insect stage, bloodstream stage trypanosomes were  
405 pooled to a cell density of 2x10<sup>6</sup> cells/ml in DTM medium with 15% fetal bovine serum  
406 immediately before use (Overath, Czichos, & Haas, 1986). *Cis*-aconitate was added to a final  
407 concentration of 6 mM (Brun et al., 1981; Overath et al., 1986) and temperature was adjusted to  
408 27°C. Procyclic parasites were grown in SDM79 medium (Brun & Schönenberger, 1979),  
409 supplemented with 10% (v/v) fetal bovine serum (Hirumi & Hirumi, 1989) and 20 mM glycerol  
410 (Schuster et al., 2017; Vassella et al., 2000).

#### 411 *Genetic manipulation of trypanosomes*

412 Transfection of pleomorphic trypanosomes was done as previously described (Zimmermann et  
413 al., 2017), using an AMAXA Nucleofector II (Lonza, Basel, Switzerland). Transgenic  
414 trypanosome clones were selected by limiting dilution in the presence of the appropriate antibiotic.  
415 The GFP:PAD1<sup>UTR</sup> reporter construct (Zimmermann et al., 2017) was used to transfect AnTat1.1

416 trypanosomes to yield the cell line ‘SIF’. The trypanosome ‘ES’ line was described previously  
417 (Zimmermann et al., 2017). It contains the reporter GFP:PAD1<sup>UTR</sup> construct and an ectopic copy  
418 of VSG gene MITat 1.6 under the control of a tetracycline-inducible T7-expression system. The  
419 EP1:YFP construct was integrated into the EP1-procyclic locus as described previously (Engstler  
420 & Boshart, 2004).

#### 421 *Immunofluorescence*

422 Cells were harvested as stated above, concentration was measured using a Neubauer chamber, and  
423 10<sup>6</sup> cells per coverslip were taken. The cells were transferred to a 1.5ml tube, washed twice with  
424 1ml of phosphate buffered saline (PBS), resuspended in 500ul of PBS, and fixed by addition of  
425 formaldehyde to a final concentration of 4% at room temperature (RT) for 20 minutes (min). The  
426 cells were pelleted by centrifugation (750 *xg*, RT, 10min), supernatant removed, resuspended in  
427 PBS, and transferred to poly-L-lysine coated coverslips in a 24-well plate. Cells were attached to  
428 coverslips by centrifugation (750 *xg*, RT, 4 min). Cells were either permeabilized with 0.25%  
429 TritonX-100 in PBS (RT, 5min) and subsequently washed twice with PBS or not permeabilized,  
430 so as to allow only surface labelling. Cells were then blocked with 3% BSA in PBS (RT, 30 min),  
431 followed by incubation with the primary (1:100 rabbit anti-PAD1; 1:500 IgG1 mouse anti-  
432 *Trypanosoma brucei* procyclic, Ascites, Clone TBRP1/247, CEDARLANE, Ontario, Canada) and  
433 secondary antibodies (Alexa488- and Alexa 594- conjugated anti-rabbit and anti-mouse, 1:100,  
434 ThermoFisher Scientific, Massachusetts, USA) diluted in PBS (1h, RT for each), with three PBS  
435 wash steps after each incubation. After the final wash, coverslips were rinsed with ddH<sub>2</sub>O, excess  
436 fluid removed by wicking, and mounted on glass slides using antifade mounting media with DAPI  
437 (Vectashield, California, USA).



438 *Tsetse maintenance*

439 The tsetse fly colony (*Glossina morsitans morsitans*) was maintained at 27°C and 70% humidity.  
440 Flies were kept in Roubaud cages and fed 3 times a week through a silicone membrane, with pre-  
441 warmed, defibrinated, sterile sheep blood (Acila, Moerfelden, Germany).

442 *Fly infection and dissection*

443 Teneral flies were infected 1-3 days post-eclosion during their first meal. It is known that teneral  
444 flies (flies that are newly hatched and unfed) are more susceptible to midgut infections compared  
445 to older flies, and it is an accepted practice in the field to use teneral flies for infections. While all  
446 of our infections were done during the flies' first bloodmeal, it is of note that 1-3 days is rather old  
447 for teneral flies (Walshe, Lehane, & Haines, 2011; Wijers, 1958). Depending on the experiment,  
448 trypanosomes were diluted in either pre-warmed TDB or sheep blood. For infections with low  
449 parasite number (Table 1), the cell density of either stumpy or slender trypanosomes was calculated  
450 and the dilutions made directly in blood without harvesting the cells. The infective meals were  
451 supplemented with 60 mM N-acetylglucosamine (Peacock, Ferris, Bailey, & Gibson, 2006). For  
452 infection with 2400 monomorphic parasites per bloodmeal, cells were additionally treated for 48  
453 hours with 12.5 mM glutathione (GSH) (MacLeod, Maudlin, Darby, & Welburn, 2007) and 100  
454  $\mu$ M 8-pCPT-cAMP (cAMP) (Vassella et al., 1997).

455 Tsetse infection status was analyzed between 35 and 40 days post-infection. Flies were euthanized  
456 with chloroform and dissected in PBS. Intact tsetse alimentary tracts were explanted and analysed  
457 microscopically, as described previously (Schuster et al., 2017). For the analysis of early  
458 trypanosome differentiation *in vivo*, slender or stumpy trypanosomes at a concentration of  $6 \times 10^5$

459 cells/ml were resuspended in TDB to the required final concentration and fed to flies. The numbers  
460 of flies used and the number of independent experiments carried out are indicated in the figure  
461 legends. Results are presented as sample means.

#### 462 *Fluorescence microscopy and video acquisition*

463 Live trypanosome imaging was performed with a fully automated DMI6000B widefield  
464 fluorescence microscope (Leica microsystems, Mannheim, Germany), equipped with a  
465 DFC365FX camera (pixel size 6.45  $\mu\text{m}$ ) and a 100x oil objective (NA 1.4). For high-speed  
466 imaging, the microscope was additionally equipped with a pco.edge sCMOS camera (PCO,  
467 Kelheim, Germany; pixel size 6.5  $\mu\text{m}$ ). Fluorescence video acquisition was performed at frame  
468 rates of 250 fps. For visualization of parasite cell cycle and morphology, slender and stumpy  
469 trypanosomes were harvested and incubated with 1 mM AMCA-sulfo-NHS (Thermo Fisher  
470 Scientific, Erlangen, Germany) for 10 minutes on ice. Cells were chemically fixed in 4% (w/v)  
471 formaldehyde and 0.05% (v/v) glutaraldehyde overnight at 4°C. DNA was visualised with 1  $\mu\text{g/ml}$   
472 DAPI immediately before analysis.

473 3D-Imaging was done with a fully automated iMIC widefield fluorescence microscope (FEI-TILL  
474 Photonics, Munich, Germany), equipped with a Sensicam qe CCD camera (PCO, Kelheim,  
475 Germany; pixel size 6.45  $\mu\text{m}$ ) and a 100x oil objective (NA 1.4). Deconvolution of image stacks  
476 was performed with the Huygens Essential software (Scientific Volume Imaging B.V., Hilversum,  
477 Netherlands). Fluorescence images are shown as maximum intensity projections of 3D-stacks in  
478 false colours with green fluorescence in green and blue fluorescence in grey.

#### 479 *Scanning electron microscopy*

480 Explanted tsetse alimentary tracts were fixed in Karnovsky solution (2% formaldehyde, 2.5%  
481 glutaraldehyde in 0.1M cacodylate buffer, pH 7.4) and incubated overnight at 4°C. Samples were  
482 washed 3 times for 5 minutes at 4°C with 0.1M cacodylate buffer, pH 7.4, followed by incubation  
483 for 1 hour at 4°C in post-fixation solution (2.5% glutaraldehyde in 0.1M cacodylate buffer, pH  
484 7.4). After additional washing, the samples were incubated for 1 hour at 4°C in 2% tannic acid in  
485 cacodylate buffer, pH 7.4, 4.2% sucrose, and washed again in water (3x for 5 minutes, 4°C).  
486 Finally, serial dehydration in acetone was performed, followed by critical point drying and  
487 platinum coating. Scanning electron microscopy was done using the JEOL JSM-7500F field  
488 emission scanning electron microscope (JEOL, Freising, Germany).

#### 489 Data Availability

490 All datasets generated during this project are provided as online source data. The cell lines used  
491 are available upon request.

#### 492 Acknowledgements

493 We thank Nicola Jones, Susanne Kramer, Manfred Alsheimer, Christian Janzen and Ricardo  
494 Benavente for discussion and critical reading of the manuscript. We thank Keith Matthews  
495 (Edinburgh) for the anti-PAD1 antibody. BM is supported by DFG grant number 396187369. ME  
496 is supported by DFG grants EN305, SPP1726 (Microswimmers – From Single Particle Motion to  
497 Collective Behaviour), GIF grant I-473-416.13/2018 (Effect of extracellular *Trypanosoma brucei*  
498 vesicles on collective and social parasite motility and development in the tsetse fly) and GRK2157  
499 (3D Tissue Models to Study Microbial Infections by Obligate Human Pathogens). ME is a member  
500 of the Wilhelm Conrad Roentgen Center for Complex Material Systems (RCCM).

501 Author contributions

502 S.S. designed the experiments, performed the experiments, analysed the data, interpreted the  
503 results and wrote the manuscript. I.S. designed the experiments, performed the experiments,  
504 analysed the data and interpreted the results. J.L. designed the experiments, performed the  
505 experiments, analysed the data, interpreted the results and wrote the manuscript. H.Z., designed  
506 the experiments, performed the experiments, analysed the data and interpreted the results. C.R.  
507 designed the experiments, performed the experiments, analysed the data and interpreted the results.  
508 B.M. interpreted the results and wrote the manuscript. M.E. conceived the study, designed the  
509 experiments, analysed the data, interpreted the results and wrote the manuscript.

510 Competing interests

511 The authors declare no competing interests.

512 References

513

514 Alvar, J., Alves, F., Bucheton, B., Burrows, L., Büscher, P., Carrillo, E., . . . Bilbe, G. (2020).

515 Implications of asymptomatic infection for the natural history of selected parasitic  
516 tropical diseases. *Semin Immunopathol*, 42(3), 231-246. doi:10.1007/s00281-020-00796-  
517 y

518 Baker, J. R., & Robertson, D. H. (1957). An experiment on the infectivity to *Glossina morsitans*  
519 of a strain of *Trypanosoma rhodesiense* and of a strain of *T. brucei*, with some  
520 observations on the longevity of infected flies. *Ann Trop Med Parasitol*, 51(2), 121-135.  
521 doi:10.1080/00034983.1957.11685801

522 BANKS, K. L. (1978). Binding of *Trypanosoma congolense* to the Walls of Small Blood  
523 Vessels\*. *The Journal of Protozoology*, 25(2), 241-245. doi:10.1111/j.1550-  
524 7408.1978.tb04405.x

525 Bargul, J. L., Jung, J., McOdimba, F. A., Omogo, C. O., Adung'a, V. O., Krüger, T., . . .  
526 Engstler, M. (2016). Species-Specific Adaptations of Trypanosome Morphology and  
527 Motility to the Mammalian Host. *PLoS Pathog*, 12(2), e1005448.  
528 doi:10.1371/journal.ppat.1005448

529 Bass, K. E., & Wang, C. C. (1991). The in vitro differentiation of pleomorphic *Trypanosoma*  
530 *brucei* from bloodstream into procyclic form requires neither intermediary nor short-  
531 stumpy stage. *Molecular and Biochemical Parasitology*, 44(2), 261-270.  
532 doi:[https://doi.org/10.1016/0166-6851\(91\)90012-U](https://doi.org/10.1016/0166-6851(91)90012-U)

533 Batram, C., Jones, N. G., Janzen, C. J., Markert, S. M., & Engstler, M. (2014). Expression site  
534 attenuation mechanistically links antigenic variation and development in *Trypanosoma*  
535 *brucei*. *Elife*, 3, e02324. doi:10.7554/eLife.02324

536 Bruce, D., Hamerton, A. E., Bateman, H. R., & Mackie, F. P. (1909). The development of  
537 *trypanosoma gambiense* in *glossina palpalis*. *Proceedings of the Royal*  
538 *Society of London. Series B, Containing Papers of a Biological Character*, 81(550), 405-  
539 414. doi:doi:10.1098/rspb.1909.0041

540 Bruce, D., Hamerton, A. E., Bateman, H. R., & Mackie, F. P. (1911). Further researches on the  
541 development of *trypanosoma gambiense* in *glossina palpalis*. *Proceedings*  
542 *of the Royal Society of London. Series B, Containing Papers of a Biological Character*,  
543 83(567), 513-527. doi:doi:10.1098/rspb.1911.0034

544 Bruce, D., London School of, H., & Tropical, M. (1895). Preliminary report on the tsetse fly  
545 disease or nagana, in Zululand. Retrieved from  
546 <http://wellcomelibrary.org/item/b21364655>

547 Brun, R., Jenni, L., Schönenberger, M., & Schell, K. F. (1981). In vitro cultivation of  
548 bloodstream forms of *Trypanosoma brucei*, *T. rhodesiense*, and *T. gambiense*. *J*  
549 *Protozool*, 28(4), 470-479. doi:10.1111/j.1550-7408.1981.tb05322.x

550 Brun, R., & Schönenberger. (1979). Cultivation and in vitro cloning or procyclic culture forms of  
551 *Trypanosoma brucei* in a semi-defined medium. Short communication. *Acta Trop*, 36(3),  
552 289-292.

553 Capewell, P., Atkins, K., Weir, W., Jamonneau, V., Camara, M., Clucas, C., . . . MacLeod, A.  
554 (2019). Resolving the apparent transmission paradox of African sleeping sickness. *PLoS*  
555 *Biol*, 17(1), e3000105. doi:10.1371/journal.pbio.3000105

- 556 Capewell, P., Cren-Travaillé, C., Marchesi, F., Johnston, P., Clucas, C., Benson, R. A., . . .  
557 MacLeod, A. (2016). The skin is a significant but overlooked anatomical reservoir for  
558 vector-borne African trypanosomes. *Elife*, 5. doi:10.7554/eLife.17716
- 559 Cross, G. A. (1975). Identification, purification and properties of clone-specific glycoprotein  
560 antigens constituting the surface coat of *Trypanosoma brucei*. *Parasitology*, 71(3), 393-  
561 417. doi:10.1017/s003118200004717x
- 562 Czichos, J., Nonnengaesser, C., & Overath, P. (1986). *Trypanosoma brucei*: cis-aconitate and  
563 temperature reduction as triggers of synchronous transformation of bloodstream to  
564 procyclic trypomastigotes in vitro. *Exp Parasitol*, 62(2), 283-291. doi:10.1016/0014-  
565 4894(86)90033-0
- 566 Dean, S., Marchetti, R., Kirk, K., & Matthews, K. R. (2009). A surface transporter family  
567 conveys the trypanosome differentiation signal. *Nature*, 459(7244), 213-217.  
568 doi:10.1038/nature07997
- 569 Duke, H. L. (1930). On the Occurrence in Man of Strains of *T. gambiense* non-transmissible  
570 cyclically by *G. palpalis*. *Parasitology*, 22(4), 490-504.  
571 doi:10.1017/S0031182000011343
- 572 Engstler, M., & Boshart, M. (2004). Cold shock and regulation of surface protein trafficking  
573 convey sensitization to inducers of stage differentiation in *Trypanosoma brucei*. *Genes*  
574 *Dev*, 18(22), 2798-2811. doi:10.1101/gad.323404
- 575 Frezil, J. L. (1971). [Application of xenodiagnosis in the detection of *T. gambiense*  
576 trypanosomiasis in immunologically suspect patients]. *Bull Soc Pathol Exot Filiales*,  
577 64(6), 871-878.
- 578 Gibson, W., & Bailey, M. (2003). The development of *Trypanosoma brucei* within the tsetse fly  
579 midgut observed using green fluorescent trypanosomes. *Kinetoplastid Biol Dis*, 2(1), 1.  
580 doi:10.1186/1475-9292-2-1
- 581 Goodwin, L. G. (1970). The pathology of African trypanosomiasis. *Trans R Soc Trop Med Hyg*,  
582 64(6), 797-817. doi:10.1016/0035-9203(70)90096-9
- 583 Heddergott, N., Krüger, T., Babu, S. B., Wei, A., Stellamanns, E., Uppaluri, S., . . . Engstler, M.  
584 (2012). Trypanosome motion represents an adaptation to the crowded environment of the  
585 vertebrate bloodstream. *PLoS Pathog*, 8(11), e1003023.  
586 doi:10.1371/journal.ppat.1003023
- 587 Herder, S., Votýpka, J., Jirků, M., Rádrová, J., Janzen, C. J., & Lukes, J. (2007). *Trypanosoma*  
588 *brucei* 29-13 strain is inducible in but not permissive for the tsetse fly vector. *Exp*  
589 *Parasitol*, 117(1), 111-114. doi:10.1016/j.exppara.2007.05.011
- 590 Hertz-Fowler, C., Figueiredo, L. M., Quail, M. A., Becker, M., Jackson, A., Bason, N., . . .  
591 Berriman, M. (2008). Telomeric expression sites are highly conserved in *Trypanosoma*  
592 *brucei*. *PLoS One*, 3(10), e3527. doi:10.1371/journal.pone.0003527
- 593 Hirumi, H., & Hirumi, K. (1989). Continuous cultivation of *Trypanosoma brucei* blood stream  
594 forms in a medium containing a low concentration of serum protein without feeder cell  
595 layers. *J Parasitol*, 75(6), 985-989.
- 596 Kleine, F. K. (1909). Positive Infektionsversuche mit *Trypanosoma brucei* durch *Glossina*  
597 *palpalis*. *Deutsche Medizinische Wochenschrift* 11.
- 598 Koch, R. (1909). Bericht über die Tätigkeit der zur Erforschung der Schlafkrankheit im Jahre  
599 1906|07 nach Ostafrika entsandten Kommission. In: Robert Koch-Institut.
- 600 Krüger, T., Schuster, S., & Engstler, M. (2018). Beyond Blood: African Trypanosomes on the  
601 Move. *Trends Parasitol*, 34(12), 1056-1067. doi:10.1016/j.pt.2018.08.002



- 602 Le Ray, D., Barry, J. D., Easton, C., & Vickerman, K. (1977). First tsetse fly transmission of the  
603 "AnTat" serodeme of *Trypanosoma brucei*. *Ann Soc Belg Med Trop*, 57(4-5), 369-381.
- 604 MacGregor, P., & Matthews, K. R. (2008). Modelling trypanosome chronicity: VSG dynasties  
605 and parasite density. *Trends Parasitol*, 24(1), 1-4. doi:10.1016/j.pt.2007.09.006
- 606 MacLeod, E. T., Maudlin, I., Darby, A. C., & Welburn, S. C. (2007). Antioxidants promote  
607 establishment of trypanosome infections in tsetse. *Parasitology*, 134(Pt 6), 827-831.  
608 doi:10.1017/s0031182007002247
- 609 Matetovici, I., De Vooght, L., & Van Den Abbeele, J. (2019). Innate immunity in the tsetse fly  
610 (*Glossina*), vector of African trypanosomes. *Dev Comp Immunol*, 98, 181-188.  
611 doi:10.1016/j.dci.2019.05.003
- 612 Matthews, K. R., Ellis, J. R., & Paterou, A. (2004). Molecular regulation of the life cycle of  
613 African trypanosomes. *Trends in Parasitology*, 20(1), 40-47.  
614 doi:<https://doi.org/10.1016/j.pt.2003.10.016>
- 615 Matthews, K. R., & Gull, K. (1994). Evidence for an interplay between cell cycle progression  
616 and the initiation of differentiation between life cycle forms of African trypanosomes.  
617 *Journal of Cell Biology*, 125(5), 1147-1156. doi:10.1083/jcb.125.5.1147
- 618 Maudlin, I., & Welburn, S. C. (1989). A single trypanosome is sufficient to infect a tsetse fly.  
619 *Ann Trop Med Parasitol*, 83(4), 431-433. doi:10.1080/00034983.1989.11812368
- 620 Mony, B. M., & Matthews, K. R. (2015). Assembling the components of the quorum sensing  
621 pathway in African trypanosomes. *Molecular Microbiology*, 96(2), 220-232.  
622 doi:10.1111/mmi.12949
- 623 Mowatt, M. R., & Clayton, C. E. (1987). Developmental regulation of a novel repetitive protein  
624 of *Trypanosoma brucei*. *Molecular and Cellular Biology*, 7(8), 2838-2844.  
625 doi:10.1128/mcb.7.8.2838
- 626 Nolan, D. P., Rolin, S., Rodriguez, J. R., Van Den Abbeele, J., & Pays, E. (2000). Slender and  
627 stumpy bloodstream forms of *Trypanosoma brucei* display a differential response to  
628 extracellular acidic and proteolytic stress. *Eur J Biochem*, 267(1), 18-27.  
629 doi:10.1046/j.1432-1327.2000.00935.x
- 630 Overath, P., Czichos, J., & Haas, C. (1986). The effect of citrate/cis-aconitate on oxidative  
631 metabolism during transformation of *Trypanosoma brucei*. *Eur J Biochem*, 160(1), 175-  
632 182. doi:10.1111/j.1432-1033.1986.tb09955.x
- 633 Peacock, L., Ferris, V., Bailey, M., & Gibson, W. (2006). Multiple effects of the lectin-inhibitory  
634 sugars D-glucosamine and N-acetyl-glucosamine on tsetse-trypanosome interactions.  
635 *Parasitology*, 132(Pt 5), 651-658. doi:10.1017/s0031182005009571
- 636 Peacock, L., Ferris, V., Bailey, M., & Gibson, W. (2008). Fly transmission and mating of  
637 *Trypanosoma brucei* strain 427. *Mol Biochem Parasitol*, 160(2), 100-106.  
638 doi:10.1016/j.molbiopara.2008.04.009
- 639 Peacock, L., Ferris, V., Bailey, M., & Gibson, W. (2012). The influence of sex and fly species on  
640 the development of trypanosomes in tsetse flies. *PLoS Negl Trop Dis*, 6(2), e1515.  
641 doi:10.1371/journal.pntd.0001515
- 642 Qiu, Y., Milanes, J. E., Jones, J. A., Noorai, R. E., Shankar, V., & Morris, J. C. (2018). Glucose  
643 Signaling Is Important for Nutrient Adaptation during Differentiation of Pleomorphic  
644 African Trypanosomes. *mSphere*, 3(5). doi:10.1128/mSphere.00366-18
- 645 Richardson, J. P., Becroft, R. P., Tolson, D. L., Liu, M. K., & Pearson, T. W. (1988). Procyclin:  
646 an unusual immunodominant glycoprotein surface antigen from the procyclic stage of



- 647 African trypanosomes. *Mol Biochem Parasitol*, 31(3), 203-216. doi:10.1016/0166-  
648 6851(88)90150-8
- 649 Rico, E., Rojas, F., Mony, B. M., Szoor, B., Macgregor, P., & Matthews, K. R. (2013).  
650 Bloodstream form pre-adaptation to the tsetse fly in *Trypanosoma brucei*. *Front Cell*  
651 *Infect Microbiol*, 3, 78. doi:10.3389/fcimb.2013.00078
- 652 Robertson, M. (1912). Notes on the Polymorphism of *Trypanosoma gambiense* in the Blood and  
653 Its Relation to the Exogenous Cycle in *Glossina palpalis*. *Proceedings of the Royal*  
654 *Society of London. Series B, Containing Papers of a Biological Character*, 85(582), 527-  
655 539. Retrieved from <http://www.jstor.org/stable/80529>
- 656 Robertson, M., & Bradford, J. R. (1913). V. Notes on the life-history of *Trypanosoma*  
657 *gambiense*, with a brief reference to the cycles of *Trypanosoma nanum* and  
658 *Trypanosoma pecorum* in *Glossina palpalis*. *Philosophical Transactions*  
659 *of the Royal Society of London. Series B, Containing Papers of a Biological Character*,  
660 203(294-302), 161-184. doi:10.1098/rstb.1913.0005
- 661 Roditi, I., Schwarz, H., Pearson, T. W., Beecroft, R. P., Liu, M. K., Richardson, J. P., . . . et al.  
662 (1989). Procyclin gene expression and loss of the variant surface glycoprotein during  
663 differentiation of *Trypanosoma brucei*. *J Cell Biol*, 108(2), 737-746.  
664 doi:10.1083/jcb.108.2.737
- 665 Rose, C., Casas-Sánchez, A., Dyer, N. A., Solórzano, C., Beckett, A. J., Middlehurst, B., . . .  
666 Acosta-Serrano, Á. (2020). *Trypanosoma brucei* colonizes the tsetse gut via an immature  
667 peritrophic matrix in the proventriculus. *Nat Microbiol*, 5(7), 909-916.  
668 doi:10.1038/s41564-020-0707-z
- 669 Rotureau, B., & Van Den Abbeele, J. (2013). Through the dark continent: African trypanosome  
670 development in the tsetse fly. *Front Cell Infect Microbiol*, 3, 53.  
671 doi:10.3389/fcimb.2013.00053
- 672 Schuster, S., Krüger, T., Subota, I., Thusek, S., Rotureau, B., Beilhack, A., & Engstler, M.  
673 (2017). Developmental adaptations of trypanosome motility to the tsetse fly host  
674 environments unravel a multifaceted in vivo microswimmer system. *Elife*, 6.  
675 doi:10.7554/eLife.27656
- 676 Seed, J. R., & Black, S. J. (1999). A revised arithmetic model of long slender to short stumpy  
677 transformation in the African trypanosomes. *J Parasitol*, 85(5), 850-854.
- 678 Sherwin, T., & Gull, K. (1989). The cell division cycle of *Trypanosoma brucei brucei*: timing of  
679 event markers and cytoskeletal modulations. *Philos Trans R Soc Lond B Biol Sci*,  
680 323(1218), 573-588. doi:10.1098/rstb.1989.0037
- 681 Trindade, S., Rijo-Ferreira, F., Carvalho, T., Pinto-Neves, D., Guegan, F., Aresta-Branco, F., . . .  
682 Figueiredo, L. M. (2016). *Trypanosoma brucei* Parasites Occupy and Functionally Adapt  
683 to the Adipose Tissue in Mice. *Cell Host Microbe*, 19(6), 837-848.  
684 doi:10.1016/j.chom.2016.05.002
- 685 Turner, C. M., Aslam, N., & Dye, C. (1995). Replication, differentiation, growth and the  
686 virulence of *Trypanosoma brucei* infections. *Parasitology*, 111 ( Pt 3), 289-300.  
687 doi:10.1017/s0031182000081841
- 688 Vassella, E., Den Abbeele, J. V., Bütikofer, P., Renggli, C. K., Furger, A., Brun, R., & Roditi, I.  
689 (2000). A major surface glycoprotein of *trypanosoma brucei* is expressed transiently  
690 during development and can be regulated post-transcriptionally by glycerol or hypoxia.  
691 *Genes Dev*, 14(5), 615-626.

- 692 Vassella, E., Krämer, R., Turner, C. M., Wankell, M., Modes, C., van den Bogaard, M., &  
693 Boshart, M. (2001). Deletion of a novel protein kinase with PX and FYVE-related  
694 domains increases the rate of differentiation of *Trypanosoma brucei*. *Mol Microbiol*,  
695 *41*(1), 33-46. doi:10.1046/j.1365-2958.2001.02471.x
- 696 Vassella, E., Reuner, B., Yutzy, B., & Boshart, M. (1997). Differentiation of African  
697 trypanosomes is controlled by a density sensing mechanism which signals cell cycle  
698 arrest via the cAMP pathway. *J Cell Sci*, *110* ( Pt 21), 2661-2671.
- 699 Vickerman, K. (1969). On the surface coat and flagellar adhesion in trypanosomes. *J Cell Sci*,  
700 *5*(1), 163-193.
- 701 Vickerman, K. (1985). Developmental cycles and biology of pathogenic trypanosomes. *Br Med*  
702 *Bull*, *41*(2), 105-114. doi:10.1093/oxfordjournals.bmb.a072036
- 703 Walshe, D. P., Lehane, M. J., & Haines, L. R. (2011). Post Eclosion Age Predicts the Prevalence  
704 of Midgut Trypanosome Infections in *Glossina*. *PLoS One*, *6*(11), e26984.  
705 doi:10.1371/journal.pone.0026984
- 706 Wijers, D. J. (1958). Factors that may influence the infection rate of *Glossina palpalis* with  
707 *Trypanosoma gambiense*. I. The age of the fly at the time of the infected feed. *Ann Trop*  
708 *Med Parasitol*, *52*(4), 385-390. doi:10.1080/00034983.1958.11685878
- 709 Wirtz, E., Leal, S., Ochatt, C., & Cross, G. A. (1999). A tightly regulated inducible expression  
710 system for conditional gene knock-outs and dominant-negative genetics in *Trypanosoma*  
711 *brucei*. *Mol Biochem Parasitol*, *99*(1), 89-101. doi:10.1016/s0166-6851(99)00002-x
- 712 Wombou Toukam, C. M., Solano, P., Bengaly, Z., Jamonneau, V., & Bucheton, B. (2011).  
713 Experimental evaluation of xenodiagnosis to detect trypanosomes at low parasitaemia  
714 levels in infected hosts. *Parasite*, *18*(4), 295-302. doi:10.1051/parasite/2011184295
- 715 Ziegelbauer, K., & Overath, P. (1990). Surface antigen change during differentiation of  
716 *Trypanosoma brucei*. *Biochem Soc Trans*, *18*(5), 731-733. doi:10.1042/bst0180731
- 717 Ziegelbauer, K., Quinten, M., Schwarz, H., Pearson, T. W., & Overath, P. (1990). Synchronous  
718 differentiation of *Trypanosoma brucei* from bloodstream to procyclic forms in vitro. *Eur*  
719 *J Biochem*, *192*(2), 373-378. doi:10.1111/j.1432-1033.1990.tb19237.x
- 720 Zimmermann, H., Subota, I., Batram, C., Kramer, S., Janzen, C. J., Jones, N. G., & Engstler, M.  
721 (2017). A quorum sensing-independent path to stumpy development in *Trypanosoma*  
722 *brucei*. *PLoS Pathog*, *13*(4), e1006324. doi:10.1371/journal.ppat.1006324

## Supplementary Video 1

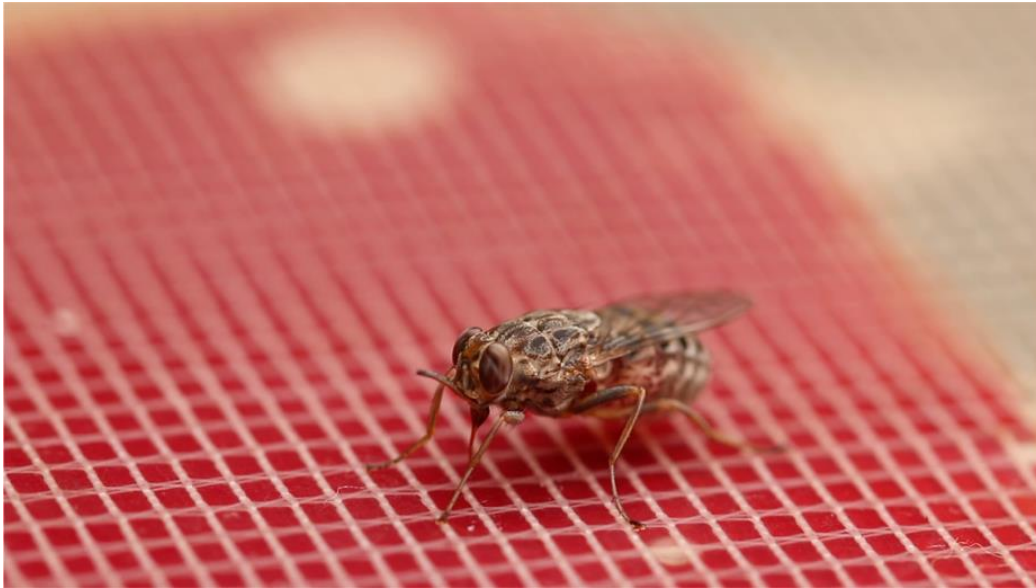

Supplemental video 1. Video of a tsetse fly taking a bloodmeal through

## Supplementary Video 2

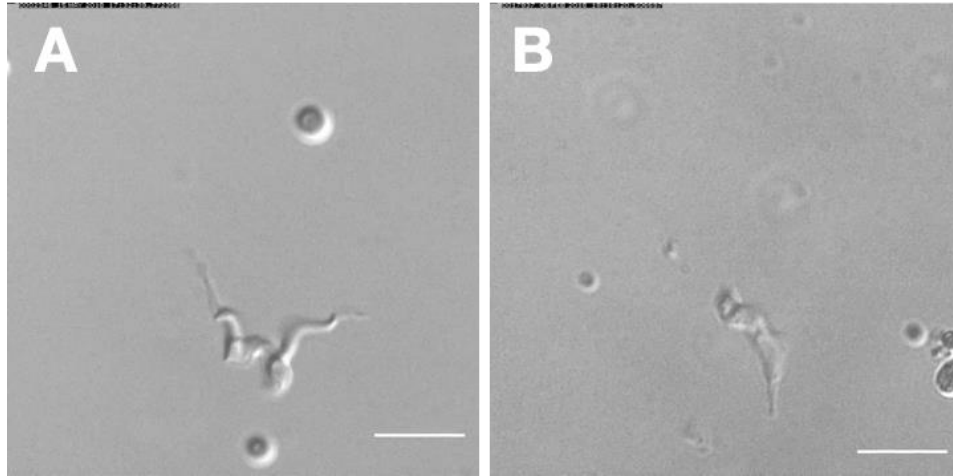

Dividing (2K2N) long slender trypanosome in the tsetse fly, 2-4 hours post infection (h.p.i). No GFP:PAD1<sup>UTR</sup> signal is detectable.

Cell cycle arrested (1K1N) short stumpy trypanosome in the tsetse fly, 2-4 h p.i. The GFP:PAD1<sup>UTR</sup> reporter is expressed.

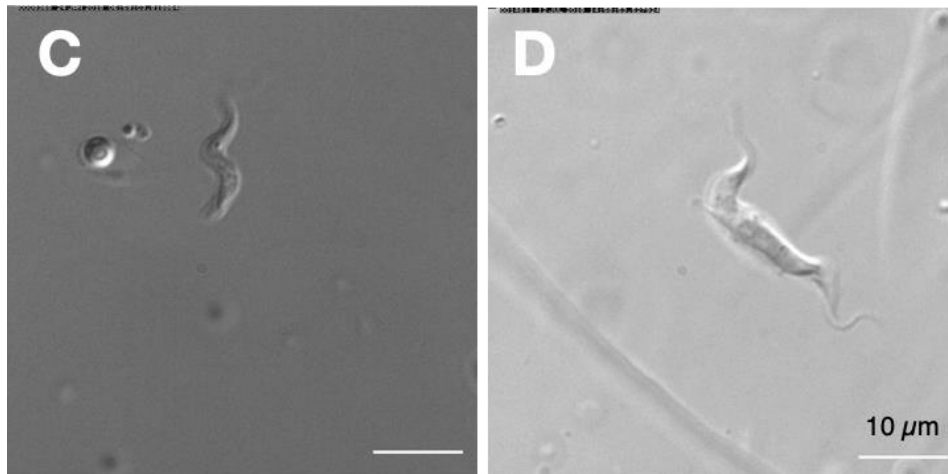

Dividing (2K1N) long slender trypanosome in the tsetse fly, 15-17 h.p.i. The GFP:PAD1<sup>UTR</sup> signal is clearly visible.

Dividing (2K2N) procyclic trypanosome in the tsetse fly, 48-50 h p.i. The cell expresses both, GFP:PAD1<sup>UTR</sup> and EP1:YFP.

Supplemental video 2. After uptake by the tsetse fly, slender trypanosomes promptly activate the PAD1 pathway, without arresting in the cell cycle. All videos were recorded at 250 fps, and the cell cycle position is indicated by DAPI staining.

## Supplemental Figure 1

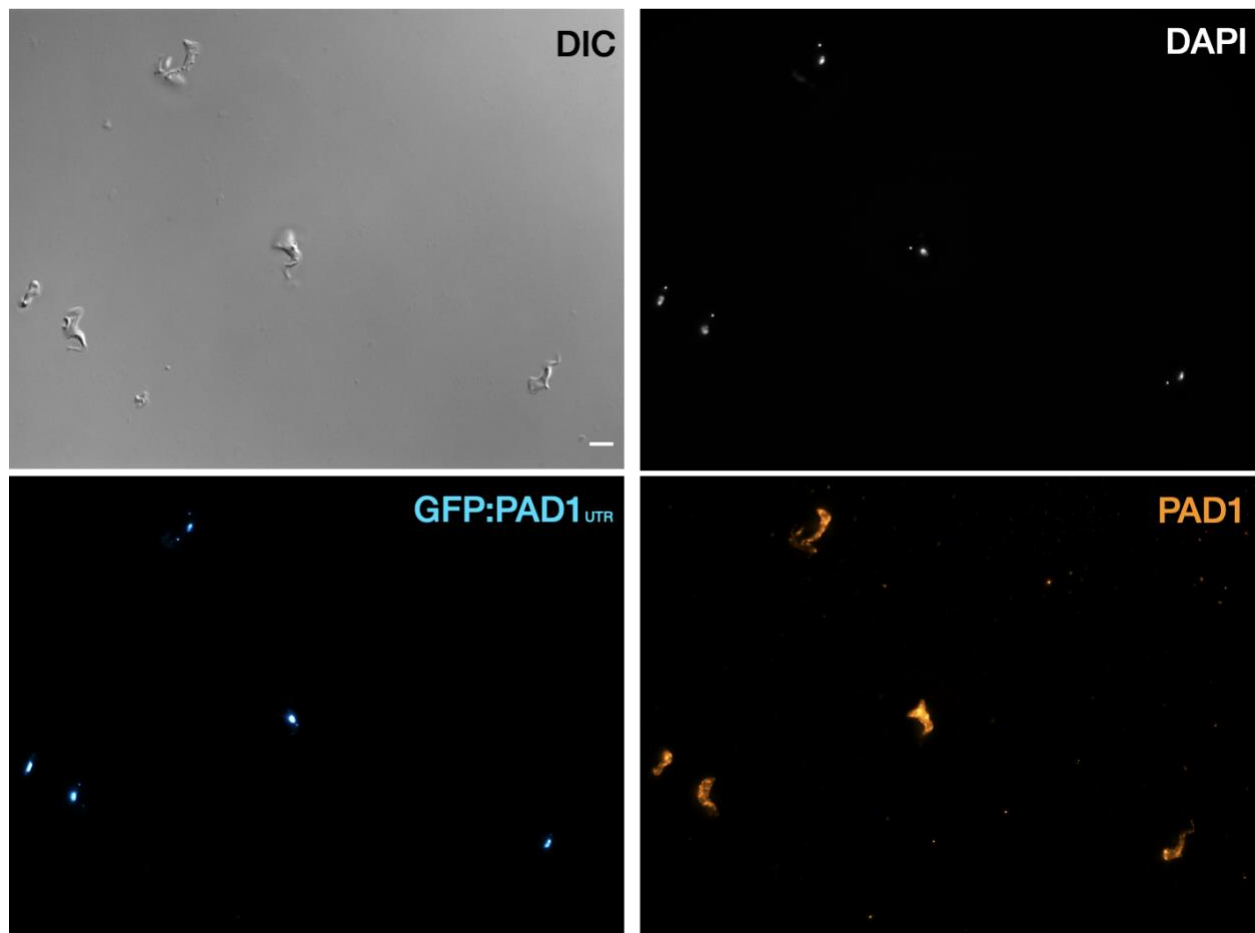

Supplemental figure 1. Stumpy trypanosomes express PAD1 on their surface when the GFP:PAD1<sup>UTR</sup> is expressed. Immunofluorescence using an anti-PAD1 antibody with stumpy trypanosomes (generated with SIF) from the GFP:PAD1<sup>UTR</sup> cell line. Cells were fixed in formaldehyde and labelled with an anti-PAD1 antibody, without membrane permeabilization, in order to only detect surface-localized proteins. DAPI (gray), GFP:PAD1<sup>UTR</sup> signal (cyan), and PAD1 protein (orange) are shown. Scale bar = 5  $\mu$ m.

## Supplemental Figure 2

### Time after *cis*-aconitane addition (h)

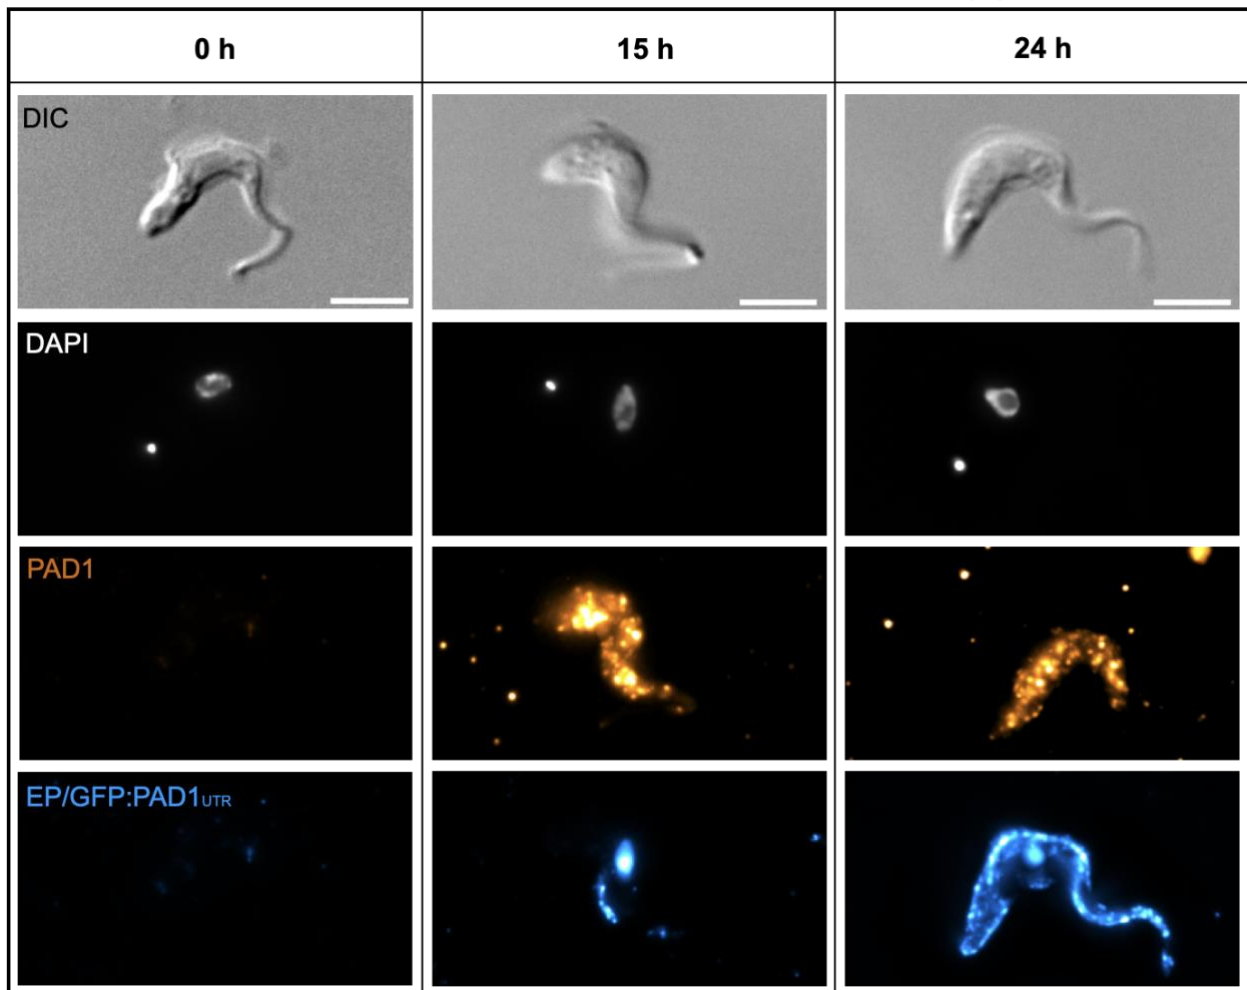

Supplemental figure 2. Slender cells express PAD and EP on their surface after the addition of *cis*-aconitane. Immunofluorescence time course (h = hours) of slender cells from the cell line GFP:PAD1<sup>UTR</sup> after the addition of *cis*-aconitane. Cells were fixed in formaldehyde and labelled with both anti-PAD1 and anti-EP antibodies, without membrane permeabilization, in order to only detect surface-localized proteins. The fluorescent nucleus seen in the 15 and 24 hr timepoints are from the background GFP:PAD1<sup>UTR</sup> signal (containing a nuclear localization sequence and having the same fluorescent signal as the secondary antibody used to target anti-EP), further showing that the PAD-1 mRNA signal is here representative of PAD1 protein on the surface. Dapi (gray), PAD-1 (orange) and EP (blue) are shown. Scale bar = 5  $\mu$ m.



723 Supplemental Text 1.

724 **Supplementary information on the number of trypanosomes in human blood**  
725 **samples, based on original observations reported by Robert Koch in 1906/07**

726 (Translated with DeepL Pro)

727 **Robert Koch. Report on the activities of the commission sent to East Africa to research sleeping**  
728 **sickness in 1906/07 (Verlag von Julius Springer, Berlin, 1909)**

729 (page 17) “If now sick people, in whose blood trypanosomes can be detected, are examined quite carefully  
730 and daily, as we have done several times, then one first learns that the number of trypanosomes in the blood  
731 is almost always very low. Often only one or two trypanosomes are present in a preparation containing  
732 several drops of blood. Five to ten trypanosomes in one preparation are already a rather rich yield. We have  
733 only exceptionally seen a larger number of trypanosomes, so that every second to third field of view of the  
734 very thick layer of the preparation was filled with one trypanosome. Such quantities of trypanosomes, which  
735 are almost regularly seen in the blood of laboratory animals, have never been found in the blood of humans.

736 The occurrence of trypanosomes in the blood is quite irregular. If they were found for one or a few days,  
737 they suddenly disappear and usually stay away for 2 to 3 weeks, only to reappear again.

738 They are then very sporadic at the beginning, become a little more numerous the next day and maybe even  
739 the third day, then decrease again for one or two days and disappear again. It seems as if they appear  
740 periodically in the blood, their presence lasts 2 to 5 days and their absence 2 to 3 weeks. In most cases, the  
741 recurrence of trypanosomes is associated with an increase in temperature and increased symptoms of  
742 disease, especially headaches and chest pain.

743 It is necessary to be familiar with the periodic appearance of trypanosomes in the blood in order not to make  
744 too many futile examinations during the diagnostic examination of the blood.

745 In blood preparations, trypanosomes have a very different appearance depending on whether they lie on the  
746 band or more towards the inside. On the periphery they appear in terms of their size, the shape of the  
747 nucleus, visibility of the undulating membrane and the flagella, just as one is used to see them in smear  
748 preparations of the blood of the test animals. But in the thick layers of the inner parts of the preparation  
749 they look considerably smaller, their colour is darker, they also have a rounded appearance, the nucleus is  
750 smaller, membrane and flagellum are hardly visible, often they seem to be missing. However, this different  
751 appearance is not due to the different composition of the trypanosomes, but is only caused by the  
752 preparation. At the edges they dry up in a very thin layer and very fast. They are thus spread out, stretched  
753 to a certain extent and immediately fixed in this form by drying. In the thick blood layer of the preparation,  
754 the drying process is only gradual, leaving the Trypanosoma time to dry in its original cylindrical shape  
755 with more or less strong shrinking of the whole body and especially of the undulating membrane and the  
756 flagella.”



757 **(Original Text in German)**

758 **Robert Koch. Bericht über die Tätigkeit der zur Erforschung der Schlafkrankheit im Jahre**  
759 **1906/07 nach Ostafrika entsandten Kommission (Verlag von Julius Springer, Berlin, 1909)**

760 (Seite 17) „Wenn nun Kranke, in deren Blut Trypanosomen nachzuweisen sind, recht sorgfältig und täglich  
761 untersucht werden, wie wir das des öfteren getan haben, dann erfährt man zunächst, daß die Anzahl der  
762 Trypanosomen im Blute fast immer eine sehr geringe ist. Auf ein Präparat, welches mehrere Tropfen Blut  
763 enthält, kommen oft nur ein oder zwei Trypanosomen. Fünf bis zehn Trypanosomen in einem Präparat  
764 bilden schon eine ziemlich reiche Ausbeute. Wir haben nur ausnahmsweise eine größere Zahl von  
765 Trypanosomen gesehen, so daß auf jedes zweite bis dritte Gesichtsfeld der sehr dicken Präparatenschicht  
766 ein Trypanosoma kam. Solche Mengen von Trypanosomen, wie man sie fast regelmäßig im Blute der  
767 Versuchstiere zu sehen bekommt, haben wir niemals im Blute der Menschen angetroffen.

768 Das Vorkommen der Trypanosomen im Blute ist ziemlich unregelmäßig. Wenn sie einen oder einige Tage  
769 lang gefunden wurden, dann sind sie plötzlich verschwunden und bleiben gewöhnlich 2 bis 3 Wochen fort,  
770 um dann wieder zum Vorschein zu kommen.

771 Sie sind dann anfangs ganz vereinzelt, werden am nächsten und vielleicht auch noch am dritten Tage ein  
772 wenig zahlreicher, nehmen dann wiederum ein bis zwei Tage ab und verschwinden von neuem. Es hat den  
773 Anschein, als ob sie periodenweise im Blute erscheinen, und zwar dauert ihr Vorhandensein 2 bis 5 Tage  
774 und ihr Fehlen 2 bis 3 Wochen. Meistens sind mit dem Wiederauftreten der Trypanosomen eine  
775 Temperatursteigerung und verstärkte Krankheitssymptome, namentlich Kopf- und Brustschmerzen,  
776 verbunden.

777 Man muß mit dem periodenweisen Erscheinen der Trypanosomen im Blute vertraut sein, um bei der  
778 diagnostischen Untersuchung des Blutes nicht zu viele vergebliche Untersuchungen zu machen.

779 In den Blutpräparaten haben die Trypanosomen ein sehr verschiedenes Aussehen, je nachdem sie am Rande  
780 oder mehr nach dem Innern zu liegen. Am Rande erscheinen sie in bezug auf ihre Größe, auf die Gestalt  
781 des Kerns, Sichtbarkeit der undulierenden Membran und der Geißel, ebenso wie man sie in  
782 Ausstrichpräparaten vom Blute der Versuchstiere zu sehen gewohnt ist. Aber in den dicken Schichten der  
783 inneren Partien des Präparates sehen sie erheblich kleiner aus, ihre Farbe ist dunkler, sie haben auch ein  
784 rundliches Aussehen, der Kern ist kleiner, Membran und Geißel sind kaum zu erkennen, oft scheinen sie  
785 zu fehlen. Dieses verschiedene Aussehen beruht nun aber nicht auf verschiedener Beschaffenheit der  
786 Trypanosomen, sondern ist nur durch die Präparation bedingt. Am Rande trocknen sie in sehr dünner  
787 Schicht und sehr schnell ein. Dabei werden sie also der Fläche nach ausgebreitet, gewissermaßen gestreckt  
788 und in dieser Form durch das Eintrocknen sofort fixiert. In der dicken Blutschicht des Präparats geht der  
789 Eintrocknungsprozeß nur allmählich vor sich, und da bleibt dem Trypanosoma Zeit, in seiner  
790 ursprünglichen walzenförmigen Gestalt unter mehr oder weniger starkem Schrumpfen des ganzen Körpers  
791 und ganz besonders der undulierenden Membran und der Geißel zu trocknen."

792 **Based on Koch's observations, the following estimations can be made:**

793 One drop of blood = **50  $\mu$ l** and "several drops" are 5 drops = 250  $\mu$ l; maximum count was 5-10  
794 trypanosomes per 5 drops on average, which means 20-40 trypanosomes are present in one  
795 milliliter of blood. Hence, one tsetse bloodmeal of 20  $\mu$ l would contain 0.4 to 0.8 trypanosomes.

796 One drop of blood = **20  $\mu$ l** and "several drops" are 5 drops = 100  $\mu$ l; maximum count was 5-10  
797 trypanosomes per 5 drops on average, which means 50-100 trypanosomes per ml are present in  
798 one milliliter of blood. Hence, one tsetse bloodmeal of 20  $\mu$ l would contain 1 to 2 trypanosomes.
